# Supplementary material for: A Genome-Wide Association Study for Agronomic Traits in Soybean Using SNP Markers and SNP-Based Haplotype Analysis
Source: PLoS One. 2017 Feb 2;12(2):e0171105. doi: 10.1371/journal.pone.0171105 (PMC5289539; doi:10.1371/journal.pone.0171105)
Supplement: S2 File — Table A. Detailed information of SNPs used in the study (SNP name, chromosome position, and polymorphic alleles in the respective tag sequence, according to soybean reference genome V1.1; www.soybase.org). Table B. Positions of haplotype blocks in the 169 tropical soybean cultivars. Data include the chromosome, the bp start and end positions of the haplotype block, the size in kbp of the haplotype block, the number of SNPs in the haplotype block based on the Glyma1.01 genome assembly. Fig A. Bar plot of the estimated population structure of 169 cultivars of soybean (k = 9). The y-axis is the subgroup membership percentage, and the x-axis is the genotype. The groups go from G1 to G9 from left to right. Cultivar names are in Table A in S1 File. Fig B. QQ-plot of MLM comparison for SY in soybean. a) Cumulative distribution of p-values for the Q model, K model and Q + K model for Cascavel environment. b) Cumulative distribution of p-values for the Q model, K model and Q + K model for Palotina environment. Fig C. QQ-plot of MLM comparison for SY in soybean. a) Cumulative distribution of p-values for the Q model, K model and Q + K model for Primavera do Leste environment. b) Cumulative distribution of p-values for the Q model, K model and Q + K model for Rio verde environment. Fig D. QQ-plot of MLM comparison for SW in soybean. a) Cumulative distribution of p-values for the Q model, K model and Q + K model for Cascavel environment. b) Cumulative distribution of p-values for the Q model, K model and Q + K model for Palotina environment. Fig E. QQ-plot of MLM comparison for SW in soybean. a) Cumulative distribution of p-values for the Q model, K model and Q + K model for Primavera do Leste environment. b) Cumulative distribution of p-values for the Q model, K model and Q + K model for Rio verde environment. Fig F. QQ-plot of MLM comparison for PH in soybean. a) Cumulative distribution of p-values of Q model, K model and Q + K model for Cascavel environment. b) Cumulative di [file pone.0171105.s002.xlsx]

## Sheet: Table A
Table A: Detailed information of SNPs used in the study (SNP name, chromosome position, and polymorphic alleles in the respective tag sequence, according to soybean reference genome V1.1; www.soybase.org).
SNP	Chromosome	Position (pb)	Allele
SNP9	1	138835	A/G
SNP34	1	281790	T/C
SNP83	1	402061	A/C
SNP206	1	565991	A/C
SNP210	1	688663	A/G
SNP219	1	901691	C/T
SNP220	1	963847	T/C
SNP1	1	1013695	A/G
SNP2	1	1059407	T/C
SNP6	1	1279146	C/T
SNP8	1	1344976	A/G
SNP11	1	1428598	T/G
SNP14	1	1502816	G/A
SNP15	1	1584120	T/G
SNP18	1	1653315	T/C
SNP20	1	1795962	A/G
SNP23	1	2099803	A/G
SNP26	1	2188771	C/T
SNP27	1	2267573	T/C
SNP29	1	2585749	A/C
SNP30	1	2708722	C/T
SNP33	1	2813785	C/T
SNP42	1	3016694	A/G
SNP43	1	3063603	T/G
SNP53	1	3327321	A/C
SNP54	1	3372977	A/C
SNP57	1	3458582	T/C
SNP61	1	3519206	T/C
SNP66	1	3585713	C/A
SNP67	1	3596804	A/C
SNP68	1	3638269	G/A
SNP72	1	3770764	A/C
SNP74	1	3832790	G/T
SNP76	1	3905200	A/G
SNP81	1	4002275	A/G
SNP86	1	4120447	C/T
SNP91	1	4213351	T/C
SNP92	1	4264556	A/G
SNP98	1	4365237	T/C
SNP102	1	4474392	A/G
SNP107	1	4517478	T/C
SNP109	1	4642545	A/G
SNP116	1	4726775	C/A
SNP162	1	5159361	A/G
SNP174	1	5300057	T/C
SNP190	1	5453015	T/G
SNP202	1	5555585	C/T
SNP207	1	5716473	G/A
SNP209	1	6754321	G/A
SNP211	1	6907127	T/G
SNP212	1	7052156	A/G
SNP213	1	7507993	A/G
SNP214	1	7659177	T/C
SNP215	1	8484147	T/C
SNP216	1	8822487	T/C
SNP4	1	11835461	T/C
SNP10	1	14097047	T/C
SNP12	1	14818197	C/T
SNP13	1	14910545	C/A
SNP16	1	15851740	A/C
SNP17	1	16388569	G/A
SNP21	1	18915610	T/C
SNP22	1	20542501	C/T
SNP24	1	21804377	G/T
SNP25	1	21883574	G/A
SNP28	1	23586582	C/A
SNP31	1	27164384	T/G
SNP32	1	27463902	G/T
SNP35	1	28628358	A/C
SNP36	1	28759367	G/A
SNP37	1	28848622	A/G
SNP38	1	29091115	A/G
SNP39	1	29169958	A/G
SNP41	1	30080907	T/C
SNP44	1	31506268	T/C
SNP45	1	31906055	A/G
SNP46	1	32070134	C/T
SNP47	1	32144754	T/C
SNP49	1	32259879	A/G
SNP50	1	32354171	C/A
SNP51	1	32493455	G/A
SNP52	1	32899706	A/G
SNP55	1	33891376	A/G
SNP56	1	34560330	T/C
SNP58	1	34668255	T/C
SNP59	1	35048367	A/G
SNP60	1	35151660	A/C
SNP62	1	35448254	C/T
SNP63	1	35496161	T/C
SNP64	1	35587217	G/T
SNP65	1	35840821	A/G
SNP69	1	36393636	C/T
SNP70	1	36723932	G/A
SNP71	1	36994849	A/G
SNP73	1	37767294	A/G
SNP75	1	38661096	A/G
SNP77	1	39561856	T/C
SNP78	1	39724988	A/G
SNP79	1	39803394	C/A
SNP80	1	39969821	T/C
SNP82	1	40195425	G/T
SNP84	1	40429688	T/C
SNP85	1	40455897	T/C
SNP87	1	41403051	C/T
SNP88	1	41493471	T/C
SNP89	1	41604325	A/G
SNP90	1	41828048	A/G
SNP93	1	42848317	T/G
SNP94	1	43106876	A/G
SNP95	1	43254220	T/C
SNP96	1	43413943	T/C
SNP97	1	43576945	G/A
SNP99	1	44304195	T/C
SNP100	1	44443891	A/G
SNP103	1	44790492	G/A
SNP106	1	45165995	A/C
SNP108	1	45975397	C/T
SNP110	1	46534870	A/G
SNP111	1	46545441	G/A
SNP112	1	46672210	C/A
SNP113	1	46765711	G/A
SNP115	1	47130768	A/G
SNP118	1	47342247	A/G
SNP121	1	47734651	C/A
SNP122	1	47807975	G/A
SNP123	1	47853391	T/C
SNP124	1	47942462	A/C
SNP125	1	48119773	C/T
SNP126	1	48181097	C/T
SNP127	1	48222840	C/T
SNP128	1	48469239	T/C
SNP129	1	48524758	C/T
SNP130	1	48565309	G/A
SNP131	1	48617111	G/A
SNP132	1	48684218	C/T
SNP133	1	48740400	G/A
SNP134	1	48860794	C/T
SNP135	1	49029066	T/G
SNP136	1	49121708	G/T
SNP137	1	49196746	A/G
SNP138	1	49281276	T/G
SNP139	1	49322760	C/A
SNP140	1	49403702	A/G
SNP141	1	49412063	T/G
SNP142	1	49566893	G/T
SNP143	1	49687691	C/T
SNP144	1	49770288	T/C
SNP145	1	49912586	C/A
SNP146	1	49987647	C/T
SNP147	1	50035662	A/C
SNP148	1	50098348	G/T
SNP149	1	50202416	C/T
SNP150	1	50262496	T/C
SNP151	1	50318073	A/G
SNP152	1	50423856	A/C
SNP153	1	50507289	A/G
SNP154	1	50644671	A/C
SNP155	1	50744456	A/C
SNP156	1	50889550	T/C
SNP157	1	51034693	A/C
SNP158	1	51097931	C/A
SNP160	1	51330200	C/A
SNP161	1	51376821	C/A
SNP163	1	51636488	G/A
SNP164	1	51721249	T/C
SNP165	1	51764870	C/T
SNP166	1	51831718	G/A
SNP167	1	51890126	A/G
SNP168	1	52102056	T/C
SNP169	1	52154366	A/G
SNP171	1	52551516	A/G
SNP172	1	52642507	T/G
SNP173	1	52887948	A/G
SNP175	1	53242363	T/G
SNP176	1	53278791	G/T
SNP177	1	53365928	A/G
SNP178	1	53570723	G/A
SNP179	1	53675540	T/C
SNP180	1	53772846	G/T
SNP181	1	53900971	G/A
SNP182	1	54025362	C/T
SNP183	1	54123492	T/C
SNP184	1	54220674	T/C
SNP185	1	54250250	T/C
SNP186	1	54285824	G/A
SNP187	1	54432202	T/G
SNP188	1	54488416	C/A
SNP189	1	54521885	T/C
SNP191	1	54622722	C/A
SNP192	1	54686660	C/A
SNP193	1	54752856	A/C
SNP194	1	54807842	C/A
SNP195	1	54843428	G/T
SNP196	1	54932021	T/G
SNP197	1	54962372	G/A
SNP198	1	55060537	G/T
SNP199	1	55124547	G/A
SNP200	1	55226574	A/G
SNP201	1	55380880	T/C
SNP204	1	55666300	G/A
SNP205	1	55789200	A/C
SNP458	2	51238	A/G
SNP282	2	207506	A/G
SNP341	2	398525	C/A
SNP383	2	447495	G/A
SNP441	2	496816	T/C
SNP450	2	504059	C/A
SNP484	2	693740	A/G
SNP495	2	769809	G/A
SNP503	2	831797	C/T
SNP511	2	881272	G/A
SNP520	2	971923	C/A
SNP227	2	1033642	T/C
SNP255	2	1398489	G/A
SNP268	2	1517184	T/G
SNP272	2	1574622	A/C
SNP275	2	1782296	G/A
SNP277	2	1830094	T/C
SNP279	2	1878469	A/G
SNP281	2	2061467	T/C
SNP284	2	2158660	G/A
SNP286	2	2246479	A/G
SNP288	2	2320070	C/A
SNP290	2	2391001	T/C
SNP292	2	2467152	C/T
SNP295	2	2629337	A/G
SNP297	2	2736727	C/A
SNP301	2	2834472	T/C
SNP302	2	2885598	C/A
SNP303	2	2920341	C/T
SNP308	2	3091665	T/G
SNP318	2	3316379	A/C
SNP320	2	3364524	C/T
SNP321	2	3429963	G/A
SNP326	2	3594255	T/G
SNP328	2	3644248	T/C
SNP331	2	3774471	G/A
SNP333	2	3835570	T/C
SNP334	2	3860736	G/A
SNP336	2	3906107	A/G
SNP338	2	3954305	C/T
SNP344	2	4019916	A/G
SNP355	2	4206514	A/G
SNP361	2	4283009	G/A
SNP365	2	4319761	C/T
SNP375	2	4430768	C/T
SNP377	2	4439399	T/C
SNP385	2	4487187	A/C
SNP402	2	4618881	T/C
SNP409	2	4688093	C/A
SNP420	2	4785649	G/T
SNP433	2	4909353	C/T
SNP438	2	4957187	A/G
SNP456	2	5107836	C/A
SNP462	2	5155733	T/G
SNP463	2	5202276	T/C
SNP464	2	5343214	T/C
SNP465	2	5380722	C/T
SNP466	2	5456974	A/G
SNP467	2	5595797	G/A
SNP468	2	5640246	C/A
SNP469	2	5809648	C/T
SNP470	2	5853742	A/C
SNP471	2	5929459	C/T
SNP472	2	5987005	C/T
SNP474	2	6180795	T/G
SNP475	2	6225129	T/G
SNP476	2	6340233	C/A
SNP477	2	6418567	A/G
SNP478	2	6503793	A/G
SNP479	2	6596937	T/G
SNP481	2	6734421	T/C
SNP482	2	6821311	A/C
SNP483	2	6889619	C/T
SNP485	2	6971683	T/C
SNP486	2	7039787	G/T
SNP487	2	7135561	T/C
SNP488	2	7219124	A/G
SNP489	2	7267240	T/G
SNP490	2	7333018	A/G
SNP491	2	7435044	T/C
SNP492	2	7517197	T/G
SNP493	2	7590666	T/G
SNP494	2	7641044	T/C
SNP496	2	7721197	G/A
SNP497	2	7790424	A/G
SNP498	2	7987834	A/G
SNP499	2	8081081	T/C
SNP500	2	8132109	G/A
SNP501	2	8170643	T/C
SNP502	2	8273157	G/A
SNP504	2	8341731	C/T
SNP505	2	8398517	G/A
SNP506	2	8455103	A/G
SNP507	2	8521511	C/A
SNP508	2	8641830	T/C
SNP509	2	8730196	G/A
SNP510	2	8807595	T/C
SNP512	2	9025221	T/C
SNP513	2	9039246	T/C
SNP514	2	9177001	G/A
SNP515	2	9289865	C/T
SNP516	2	9370878	G/T
SNP517	2	9446659	T/C
SNP518	2	9592601	A/G
SNP519	2	9670302	A/G
SNP521	2	9795247	C/T
SNP522	2	9873369	T/C
SNP523	2	9990067	T/C
SNP222	2	10074856	T/C
SNP223	2	10140292	A/G
SNP224	2	10200610	C/T
SNP225	2	10241719	A/G
SNP226	2	10302121	G/A
SNP228	2	10373210	C/T
SNP229	2	10536842	A/G
SNP230	2	10709966	C/T
SNP231	2	10810984	G/A
SNP232	2	10843145	C/T
SNP233	2	10954777	T/C
SNP234	2	11042236	G/A
SNP235	2	11180500	A/C
SNP236	2	11257077	A/G
SNP237	2	11494870	T/C
SNP238	2	11540598	C/T
SNP239	2	11628896	T/C
SNP240	2	11638087	T/C
SNP241	2	11870846	C/T
SNP242	2	11998056	T/C
SNP243	2	12078209	G/A
SNP244	2	12168684	T/G
SNP245	2	12244605	A/G
SNP246	2	12303360	T/G
SNP247	2	12682738	A/G
SNP249	2	12736686	A/G
SNP250	2	13117615	T/C
SNP251	2	13476678	G/A
SNP252	2	13663384	C/T
SNP253	2	13737468	A/C
SNP254	2	13963693	C/A
SNP256	2	14022512	C/T
SNP257	2	14127417	A/G
SNP258	2	14215487	T/G
SNP259	2	14266842	G/A
SNP260	2	14345423	T/G
SNP261	2	14357211	T/C
SNP262	2	14508130	C/T
SNP263	2	14561578	A/G
SNP264	2	14715495	T/C
SNP265	2	14817982	A/C
SNP266	2	14894202	A/C
SNP267	2	15067760	G/A
SNP269	2	15213831	T/G
SNP270	2	15290331	G/A
SNP271	2	15426845	A/C
SNP273	2	16287798	T/C
SNP274	2	16980821	T/C
SNP276	2	18273334	A/G
SNP278	2	18626206	C/T
SNP280	2	19218365	T/C
SNP283	2	21065065	T/C
SNP285	2	22067031	G/T
SNP287	2	22829006	T/C
SNP289	2	23589448	C/T
SNP291	2	24460388	G/T
SNP293	2	25466460	A/G
SNP294	2	26182810	A/G
SNP296	2	27295513	G/A
SNP298	2	27824060	T/G
SNP299	2	28128455	G/T
SNP300	2	28331531	C/A
SNP304	2	29528097	T/C
SNP305	2	30250662	T/C
SNP306	2	30439101	A/G
SNP307	2	30787675	T/G
SNP309	2	30996860	A/G
SNP310	2	31905028	C/A
SNP311	2	32043775	T/C
SNP312	2	32346915	G/A
SNP313	2	32487728	T/C
SNP314	2	32605960	T/C
SNP315	2	32880763	C/T
SNP316	2	32904473	T/C
SNP317	2	33117418	G/T
SNP319	2	33608259	T/C
SNP322	2	34381583	T/C
SNP323	2	34765594	A/G
SNP324	2	35348897	T/C
SNP325	2	35471507	A/G
SNP327	2	36300454	T/C
SNP329	2	36666688	T/C
SNP330	2	37441958	T/C
SNP332	2	38261529	G/A
SNP335	2	38843686	T/C
SNP337	2	39299266	A/G
SNP339	2	39548191	C/A
SNP340	2	39722733	G/T
SNP342	2	39931059	T/C
SNP343	2	40019470	G/A
SNP345	2	40284206	G/A
SNP346	2	40730869	T/C
SNP347	2	41021889	G/T
SNP348	2	41481689	T/C
SNP349	2	41505846	A/G
SNP350	2	41583970	C/A
SNP351	2	41788343	T/C
SNP352	2	41860500	T/C
SNP353	2	41931129	T/G
SNP354	2	41979401	T/C
SNP356	2	42073855	G/A
SNP357	2	42204732	T/C
SNP358	2	42355637	A/G
SNP359	2	42404873	T/C
SNP360	2	42788887	A/G
SNP362	2	42844384	T/C
SNP363	2	42928916	T/C
SNP364	2	43139891	G/A
SNP366	2	43641969	C/A
SNP367	2	43725963	A/G
SNP368	2	43777700	A/G
SNP369	2	43889571	T/C
SNP370	2	43952429	A/G
SNP371	2	44033150	T/C
SNP372	2	44114374	C/A
SNP373	2	44156636	G/T
SNP374	2	44190678	C/T
SNP376	2	44354376	T/C
SNP378	2	44401175	C/T
SNP379	2	44461839	G/A
SNP380	2	44510528	T/C
SNP382	2	44620331	A/G
SNP384	2	44863895	G/T
SNP386	2	44923400	G/T
SNP387	2	45051600	A/G
SNP388	2	45088385	T/C
SNP389	2	45162941	A/G
SNP390	2	45183828	C/T
SNP391	2	45289939	A/G
SNP392	2	45366539	A/G
SNP393	2	45445720	T/C
SNP394	2	45533271	C/A
SNP395	2	45596920	A/G
SNP396	2	45602331	C/T
SNP397	2	45805567	A/G
SNP398	2	45940601	T/C
SNP399	2	46023727	T/C
SNP400	2	46060359	C/A
SNP401	2	46187810	C/T
SNP403	2	46288368	G/A
SNP404	2	46504621	T/C
SNP405	2	46555984	C/T
SNP406	2	46630927	G/A
SNP407	2	46778366	G/A
SNP408	2	46855228	G/A
SNP410	2	47051470	C/T
SNP411	2	47064977	G/A
SNP412	2	47125519	G/A
SNP413	2	47268207	C/T
SNP414	2	47314350	T/C
SNP415	2	47394316	A/G
SNP416	2	47515175	G/A
SNP417	2	47528737	C/T
SNP418	2	47790307	C/T
SNP419	2	47853972	T/C
SNP421	2	47991459	G/A
SNP422	2	48054859	C/T
SNP423	2	48185680	G/A
SNP424	2	48248895	A/C
SNP425	2	48382122	G/A
SNP426	2	48583877	A/C
SNP427	2	48594877	C/T
SNP428	2	48702118	T/G
SNP429	2	48821067	T/C
SNP430	2	48874048	G/A
SNP432	2	49069634	C/T
SNP434	2	49126947	T/C
SNP435	2	49276771	G/A
SNP436	2	49388210	T/G
SNP439	2	49616128	C/A
SNP440	2	49679631	A/G
SNP442	2	49727178	A/C
SNP443	2	49776196	A/G
SNP444	2	49986718	G/A
SNP445	2	50175034	G/A
SNP446	2	50242535	T/C
SNP447	2	50304676	T/C
SNP448	2	50358347	C/T
SNP449	2	50383419	C/T
SNP451	2	50546149	C/T
SNP452	2	50706913	G/A
SNP454	2	50936574	G/T
SNP455	2	51025014	A/C
SNP457	2	51154756	C/T
SNP459	2	51272051	C/A
SNP460	2	51411364	G/A
SNP461	2	51429037	T/C
SNP550	3	18316	G/A
SNP562	3	206707	G/A
SNP573	3	241447	C/A
SNP605	3	345478	G/A
SNP693	3	426154	C/A
SNP754	3	566774	G/A
SNP761	3	715393	G/A
SNP762	3	785680	A/C
SNP765	3	829023	G/T
SNP767	3	949581	T/C
SNP527	3	1077329	C/T
SNP530	3	1209205	G/T
SNP533	3	1302748	T/C
SNP537	3	1374930	T/G
SNP539	3	1441844	C/A
SNP542	3	1583754	T/C
SNP545	3	1671384	C/A
SNP546	3	1718435	A/G
SNP547	3	1758253	T/C
SNP552	3	1853758	T/C
SNP555	3	1926419	T/G
SNP557	3	1981847	C/T
SNP559	3	2024899	G/A
SNP563	3	2083705	C/T
SNP566	3	2215518	A/G
SNP568	3	2224975	G/A
SNP572	3	2373742	T/C
SNP575	3	2485916	T/C
SNP583	3	2818076	T/C
SNP585	3	2892089	C/T
SNP587	3	2932028	G/A
SNP594	3	3087237	A/G
SNP596	3	3164784	G/A
SNP599	3	3225968	G/A
SNP602	3	3334303	C/A
SNP604	3	3365988	T/G
SNP608	3	3497393	A/C
SNP614	3	3562176	C/T
SNP622	3	3618454	G/T
SNP627	3	3659662	A/G
SNP651	3	3828735	G/A
SNP660	3	3907697	A/G
SNP710	3	4468196	C/T
SNP719	3	4578272	G/A
SNP729	3	4665923	C/T
SNP734	3	4718162	C/A
SNP743	3	4782127	T/C
SNP744	3	4833386	A/G
SNP745	3	4901669	A/G
SNP746	3	5106459	T/G
SNP748	3	5165511	A/C
SNP749	3	5217414	C/T
SNP750	3	5297117	C/A
SNP751	3	5341695	A/G
SNP752	3	5451606	A/C
SNP753	3	5502496	T/C
SNP755	3	5733321	A/G
SNP756	3	5796468	A/G
SNP757	3	6459920	A/G
SNP758	3	6631189	A/G
SNP759	3	6844115	A/C
SNP760	3	7018964	T/C
SNP763	3	8003327	T/C
SNP764	3	8228940	G/A
SNP766	3	8434431	A/G
SNP768	3	9641204	C/A
SNP769	3	9789580	G/T
SNP524	3	10408873	C/T
SNP525	3	10552078	T/G
SNP528	3	10982565	T/C
SNP529	3	11396505	C/T
SNP531	3	12163115	T/G
SNP532	3	13015481	T/C
SNP534	3	13245008	C/T
SNP536	3	13642775	C/T
SNP538	3	14228358	T/C
SNP540	3	14840739	T/G
SNP541	3	15615896	C/T
SNP543	3	16281390	A/G
SNP544	3	16612828	A/G
SNP548	3	18113789	C/T
SNP549	3	18254831	C/T
SNP551	3	18512439	C/T
SNP561	3	20637413	G/T
SNP564	3	21347065	C/T
SNP565	3	21918775	A/G
SNP567	3	22189671	C/T
SNP569	3	22259196	C/A
SNP570	3	22371830	G/A
SNP571	3	23324209	C/T
SNP577	3	25818759	T/C
SNP578	3	27021460	A/G
SNP579	3	27285377	A/G
SNP580	3	27566511	T/G
SNP581	3	27803514	A/G
SNP582	3	28015945	T/C
SNP584	3	28414908	A/G
SNP586	3	29074893	T/C
SNP588	3	29375217	T/C
SNP589	3	29628783	T/C
SNP590	3	29817747	G/T
SNP592	3	30529089	A/C
SNP593	3	30809885	T/C
SNP595	3	30955790	A/G
SNP597	3	31711487	A/G
SNP601	3	33146650	C/T
SNP603	3	33399114	A/G
SNP606	3	34741364	A/G
SNP609	3	35122599	C/T
SNP610	3	35201990	G/A
SNP611	3	35330372	G/T
SNP612	3	35516341	C/T
SNP613	3	35556758	C/T
SNP615	3	35712315	A/G
SNP616	3	35797299	A/G
SNP617	3	35913889	T/C
SNP618	3	35968599	G/A
SNP619	3	36018412	T/C
SNP620	3	36058927	T/C
SNP621	3	36178327	G/A
SNP623	3	36386316	G/A
SNP624	3	36396038	A/C
SNP625	3	36438792	G/T
SNP626	3	36489202	C/T
SNP628	3	36634361	G/A
SNP629	3	36714581	T/C
SNP630	3	36816006	A/G
SNP631	3	36863476	C/A
SNP632	3	36969159	A/G
SNP633	3	37024877	C/T
SNP634	3	37146641	T/C
SNP635	3	37245981	T/C
SNP636	3	37286104	T/C
SNP637	3	37326508	A/G
SNP638	3	37366357	C/A
SNP639	3	37432542	C/A
SNP640	3	37488779	G/A
SNP641	3	37654429	G/T
SNP642	3	37711069	G/A
SNP643	3	37773419	C/T
SNP644	3	37819433	T/C
SNP645	3	37902930	C/T
SNP646	3	37963252	A/G
SNP647	3	38069022	A/G
SNP648	3	38121627	T/C
SNP649	3	38173815	A/C
SNP650	3	38263112	A/G
SNP653	3	38415618	T/G
SNP654	3	38469714	C/T
SNP655	3	38526701	A/G
SNP656	3	38761991	G/T
SNP657	3	38862467	A/G
SNP658	3	38931849	C/A
SNP659	3	38976026	C/T
SNP661	3	39351009	C/T
SNP662	3	39491355	G/T
SNP663	3	39574966	T/C
SNP665	3	39690419	T/G
SNP666	3	39796778	T/G
SNP667	3	39843152	T/C
SNP668	3	39915523	C/T
SNP669	3	39945298	T/C
SNP670	3	39998708	A/G
SNP671	3	40052612	T/C
SNP672	3	40115297	C/T
SNP673	3	40197155	A/C
SNP674	3	40270199	T/C
SNP675	3	40417269	A/G
SNP676	3	40600088	A/G
SNP677	3	40613405	T/C
SNP678	3	40663609	G/A
SNP679	3	40727780	A/G
SNP680	3	41020834	T/C
SNP681	3	41135466	C/T
SNP682	3	41305199	G/A
SNP683	3	41443410	G/A
SNP686	3	41605831	A/C
SNP688	3	41984976	T/C
SNP689	3	42148379	T/G
SNP690	3	42223337	G/A
SNP691	3	42308865	C/T
SNP692	3	42595334	T/C
SNP698	3	43242012	G/T
SNP699	3	43355787	C/T
SNP700	3	43504459	G/A
SNP701	3	43525455	A/G
SNP702	3	43599557	T/C
SNP703	3	43707104	A/G
SNP704	3	44019995	G/A
SNP706	3	44171693	A/C
SNP707	3	44326930	A/G
SNP708	3	44381016	G/T
SNP709	3	44475419	C/A
SNP711	3	44693761	T/C
SNP712	3	44920668	A/G
SNP713	3	44992819	A/G
SNP714	3	45217524	G/T
SNP715	3	45416367	C/T
SNP716	3	45488992	G/A
SNP717	3	45614970	C/T
SNP718	3	45668212	A/G
SNP720	3	45994991	T/C
SNP721	3	46055685	C/T
SNP722	3	46209325	G/A
SNP723	3	46214163	C/T
SNP724	3	46337339	T/C
SNP725	3	46380953	T/G
SNP726	3	46445958	G/T
SNP727	3	46508111	A/C
SNP728	3	46592189	A/G
SNP730	3	46889507	T/C
SNP731	3	46998040	A/G
SNP732	3	47039930	T/C
SNP733	3	47106922	G/A
SNP735	3	47212539	T/C
SNP736	3	47320906	C/T
SNP737	3	47386481	A/C
SNP738	3	47440662	C/T
SNP739	3	47500240	G/A
SNP740	3	47591923	T/C
SNP742	3	47713742	T/C
SNP771	4	10805	T/C
SNP796	4	169864	A/C
SNP824	4	282832	A/G
SNP848	4	382134	A/G
SNP914	4	456406	A/G
SNP961	4	516796	A/G
SNP964	4	547510	C/T
SNP975	4	622489	A/G
SNP986	4	717646	C/T
SNP774	4	1126451	A/G
SNP776	4	1193028	G/A
SNP781	4	1272649	G/A
SNP786	4	1407302	A/G
SNP790	4	1499424	T/G
SNP793	4	1621110	C/A
SNP798	4	1726991	G/T
SNP800	4	1778735	A/G
SNP804	4	1930897	T/C
SNP805	4	2045637	T/C
SNP809	4	2129696	T/C
SNP811	4	2268644	T/C
SNP816	4	2574201	T/G
SNP817	4	2632511	T/G
SNP819	4	2681971	T/C
SNP821	4	2794768	T/C
SNP825	4	2877511	T/C
SNP826	4	2923894	G/A
SNP827	4	2968281	C/T
SNP829	4	3077939	A/G
SNP831	4	3138411	A/G
SNP835	4	3368832	T/C
SNP837	4	3487482	G/T
SNP839	4	3534961	A/G
SNP842	4	3682732	G/T
SNP846	4	3793488	C/T
SNP854	4	3996191	C/T
SNP859	4	4054945	A/C
SNP870	4	4157610	C/T
SNP873	4	4217329	G/T
SNP888	4	4372365	G/T
SNP905	4	4497001	T/C
SNP918	4	4599981	G/T
SNP950	4	4841626	A/G
SNP959	4	4922361	T/C
SNP960	4	5034406	T/C
SNP962	4	5172181	A/G
SNP963	4	5279327	C/T
SNP965	4	5488680	G/A
SNP966	4	5537978	G/A
SNP967	4	5592124	C/T
SNP968	4	5659880	A/C
SNP969	4	5750694	G/A
SNP970	4	5950275	G/A
SNP971	4	6013342	A/C
SNP972	4	6064896	G/A
SNP973	4	6145192	T/C
SNP974	4	6223324	T/C
SNP976	4	6341132	T/C
SNP979	4	6643461	A/G
SNP981	4	6793324	G/A
SNP982	4	6897543	G/A
SNP983	4	6949955	C/A
SNP984	4	7052221	A/G
SNP985	4	7115824	A/G
SNP987	4	7278749	G/T
SNP988	4	7436164	T/C
SNP989	4	7672403	A/G
SNP990	4	7795928	A/G
SNP991	4	7957588	G/T
SNP992	4	8004029	C/A
SNP993	4	8065917	C/T
SNP994	4	8126739	A/G
SNP996	4	8317828	G/A
SNP997	4	8457367	T/C
SNP998	4	8493767	T/C
SNP999	4	8701289	A/G
SNP1000	4	8760004	T/G
SNP1001	4	8845668	G/T
SNP1002	4	8937855	A/G
SNP1003	4	9002718	G/A
SNP1004	4	9099671	A/G
SNP1005	4	9242542	C/T
SNP1006	4	9334751	T/C
SNP1007	4	9442969	T/C
SNP1008	4	9464579	T/C
SNP1009	4	9511650	A/G
SNP1010	4	9553531	A/G
SNP1011	4	9600878	C/A
SNP1012	4	9713316	G/A
SNP1013	4	9720640	G/A
SNP1014	4	9824083	A/G
SNP770	4	10117285	G/A
SNP772	4	10868076	G/A
SNP773	4	11138059	A/G
SNP775	4	11433919	T/C
SNP777	4	11936288	G/T
SNP778	4	12216645	G/A
SNP779	4	12283176	T/C
SNP780	4	12410533	A/G
SNP782	4	13022455	C/T
SNP783	4	13284121	T/C
SNP784	4	13509340	T/C
SNP785	4	13968774	G/A
SNP787	4	14213918	C/T
SNP788	4	14549891	C/T
SNP789	4	14641479	A/C
SNP791	4	15048603	A/G
SNP792	4	15496025	T/G
SNP794	4	16244996	G/A
SNP795	4	16338974	A/G
SNP797	4	16999532	T/C
SNP799	4	17773168	A/G
SNP801	4	18000454	A/C
SNP802	4	18924971	G/T
SNP803	4	19107515	A/G
SNP806	4	20729591	G/A
SNP807	4	20796034	A/G
SNP808	4	20921247	T/C
SNP812	4	23251720	T/C
SNP813	4	24086337	A/G
SNP814	4	24276060	G/T
SNP815	4	25230364	T/C
SNP818	4	26520135	C/A
SNP820	4	27207244	A/G
SNP822	4	28018833	G/A
SNP823	4	28121297	A/G
SNP828	4	30457043	A/G
SNP832	4	31436577	C/A
SNP833	4	32800373	C/T
SNP840	4	36357346	T/C
SNP841	4	36604337	A/G
SNP843	4	37126858	A/G
SNP844	4	37474521	G/T
SNP845	4	37799809	T/C
SNP847	4	38135736	T/G
SNP850	4	38840391	A/G
SNP851	4	39087487	T/C
SNP853	4	39753174	T/C
SNP855	4	40345917	C/T
SNP856	4	40398866	C/T
SNP857	4	40454337	A/G
SNP858	4	40545788	G/A
SNP863	4	40811025	C/A
SNP864	4	40919718	T/C
SNP865	4	40995323	A/G
SNP866	4	41071612	A/G
SNP867	4	41249369	T/C
SNP868	4	41328216	A/G
SNP869	4	41537794	G/A
SNP871	4	41586276	G/A
SNP872	4	42153936	T/C
SNP874	4	42290567	T/C
SNP875	4	42459236	A/C
SNP876	4	42638631	T/C
SNP877	4	42754380	A/C
SNP878	4	42832910	C/T
SNP879	4	42951376	G/A
SNP880	4	43002324	T/G
SNP881	4	43058492	T/G
SNP882	4	43059665	A/C
SNP883	4	43157873	A/G
SNP884	4	43390997	A/C
SNP885	4	43505831	C/T
SNP887	4	43645980	A/C
SNP889	4	43738337	A/C
SNP890	4	43800862	C/T
SNP891	4	43885291	A/G
SNP892	4	43966863	G/A
SNP893	4	44046112	T/C
SNP894	4	44114492	T/C
SNP895	4	44170480	C/A
SNP896	4	44220515	C/T
SNP897	4	44290827	T/C
SNP898	4	44383936	C/T
SNP899	4	44518121	G/A
SNP900	4	44611649	T/C
SNP903	4	44873112	T/C
SNP904	4	44924553	A/G
SNP907	4	45093386	G/A
SNP908	4	45146452	T/G
SNP909	4	45221708	C/T
SNP910	4	45313496	C/T
SNP911	4	45440686	T/C
SNP912	4	45514250	A/G
SNP913	4	45613405	T/C
SNP915	4	45773963	G/A
SNP916	4	45857325	T/C
SNP917	4	45999196	C/A
SNP919	4	46086046	G/A
SNP920	4	46215544	T/C
SNP921	4	46280438	G/A
SNP922	4	46333298	A/G
SNP923	4	46390533	T/C
SNP924	4	46428018	A/C
SNP925	4	46469835	C/A
SNP926	4	46517129	C/T
SNP927	4	46550218	A/G
SNP928	4	46700121	A/G
SNP929	4	46774083	G/A
SNP930	4	46835852	A/C
SNP931	4	46873023	T/G
SNP932	4	46932652	T/G
SNP933	4	46966383	G/A
SNP934	4	47092275	T/C
SNP935	4	47158138	T/C
SNP936	4	47313368	T/G
SNP938	4	47414790	G/A
SNP939	4	47540792	T/C
SNP940	4	47718975	A/C
SNP941	4	47815130	T/G
SNP942	4	47957714	A/C
SNP943	4	47981836	T/C
SNP944	4	48140577	G/A
SNP945	4	48198636	G/A
SNP946	4	48244118	G/A
SNP947	4	48329448	G/A
SNP948	4	48354680	T/C
SNP949	4	48414788	T/C
SNP951	4	48605014	T/G
SNP952	4	48670188	A/G
SNP953	4	48726831	C/T
SNP954	4	48812166	A/G
SNP955	4	48856621	C/T
SNP956	4	48922546	A/G
SNP957	4	48977363	C/T
SNP958	4	49060197	T/G
SNP1062	5	285672	T/C
SNP1206	5	394764	T/C
SNP1239	5	429856	A/G
SNP1241	5	492138	C/T
SNP1242	5	538322	G/T
SNP1243	5	649267	A/G
SNP1244	5	682648	A/G
SNP1250	5	765761	G/T
SNP1269	5	888436	A/G
SNP1273	5	937362	A/G
SNP1274	5	997108	A/G
SNP1016	5	1043092	G/T
SNP1017	5	1062563	A/G
SNP1018	5	1106905	A/G
SNP1019	5	1175804	G/A
SNP1020	5	1209782	A/G
SNP1021	5	1236013	A/C
SNP1023	5	1294282	C/T
SNP1024	5	1324331	C/T
SNP1025	5	1490457	C/T
SNP1026	5	1500111	G/A
SNP1027	5	1547102	C/T
SNP1028	5	1602402	C/T
SNP1030	5	1705841	A/G
SNP1031	5	1744708	G/A
SNP1032	5	1802095	T/C
SNP1034	5	1979844	C/A
SNP1035	5	2008838	G/T
SNP1036	5	2032662	C/T
SNP1037	5	2109639	G/T
SNP1040	5	2216235	A/G
SNP1041	5	2352061	C/T
SNP1044	5	2415950	G/A
SNP1046	5	2506820	T/G
SNP1047	5	2548644	C/T
SNP1048	5	2647363	C/T
SNP1052	5	2674662	T/G
SNP1054	5	2708074	T/C
SNP1059	5	2738064	T/C
SNP1066	5	2889929	A/G
SNP1072	5	2967386	A/G
SNP1082	5	3131772	G/A
SNP1100	5	3284858	A/G
SNP1127	5	3475990	T/C
SNP1135	5	3505412	G/A
SNP1145	5	3569588	T/C
SNP1161	5	3664732	A/G
SNP1177	5	3764264	C/T
SNP1191	5	3859212	C/T
SNP1199	5	3905135	T/C
SNP1217	5	4037530	A/G
SNP1223	5	4079565	C/T
SNP1245	5	7107494	T/C
SNP1246	5	7499958	G/T
SNP1247	5	7542380	A/C
SNP1248	5	7588610	C/T
SNP1249	5	7628516	C/A
SNP1251	5	7681969	G/A
SNP1252	5	7714399	A/C
SNP1253	5	7766091	G/A
SNP1255	5	7842055	T/C
SNP1257	5	8031928	A/C
SNP1258	5	8074146	A/G
SNP1259	5	8140171	A/G
SNP1260	5	8295170	T/C
SNP1262	5	8492435	A/G
SNP1263	5	8525159	C/T
SNP1264	5	8562208	A/G
SNP1265	5	8597246	C/T
SNP1266	5	8656389	T/C
SNP1267	5	8695812	A/G
SNP1268	5	8736763	G/A
SNP1270	5	8956994	C/T
SNP1271	5	9012813	A/G
SNP1272	5	9097414	G/A
SNP1015	5	10273133	T/C
SNP1029	5	16220329	T/C
SNP1039	5	21633090	T/C
SNP1042	5	23799613	A/G
SNP1043	5	23934937	A/G
SNP1049	5	26685967	G/A
SNP1050	5	26716419	G/T
SNP1051	5	26728271	G/A
SNP1053	5	26773791	T/C
SNP1055	5	27214654	G/A
SNP1056	5	27226936	A/G
SNP1057	5	27342672	T/G
SNP1058	5	27365188	A/G
SNP1060	5	27460724	A/G
SNP1061	5	28259595	A/G
SNP1063	5	28734075	T/C
SNP1064	5	28856521	T/C
SNP1065	5	28880254	G/A
SNP1067	5	29020658	G/A
SNP1068	5	29461536	A/G
SNP1069	5	29489577	A/G
SNP1070	5	29642681	A/C
SNP1071	5	29660089	C/T
SNP1073	5	29970914	A/G
SNP1074	5	30172432	C/T
SNP1076	5	30702753	T/C
SNP1077	5	30753835	T/C
SNP1078	5	30976228	G/A
SNP1079	5	31100462	G/A
SNP1080	5	31160955	A/G
SNP1081	5	31274857	A/G
SNP1083	5	31317887	C/T
SNP1084	5	31334797	C/T
SNP1085	5	31399568	T/G
SNP1086	5	31454134	T/C
SNP1087	5	31488398	G/A
SNP1088	5	31553830	C/A
SNP1089	5	31605772	A/G
SNP1090	5	31662958	A/C
SNP1091	5	31767626	A/G
SNP1092	5	31827868	T/G
SNP1093	5	31856071	A/G
SNP1094	5	32130134	T/C
SNP1095	5	32327497	T/C
SNP1096	5	32361439	C/A
SNP1097	5	32565157	T/C
SNP1098	5	32654943	T/C
SNP1099	5	32734184	G/A
SNP1101	5	32980603	A/G
SNP1102	5	33050904	A/G
SNP1103	5	33075880	T/C
SNP1104	5	33130272	A/G
SNP1105	5	33176582	G/A
SNP1106	5	33268964	T/G
SNP1107	5	33472263	A/C
SNP1108	5	33501321	C/T
SNP1109	5	33618722	T/C
SNP1110	5	33651401	T/C
SNP1111	5	33737561	T/C
SNP1112	5	33785297	T/C
SNP1113	5	33843473	C/T
SNP1114	5	33929183	C/T
SNP1115	5	34002033	A/G
SNP1116	5	34034547	T/C
SNP1117	5	34081675	A/G
SNP1118	5	34115366	T/C
SNP1119	5	34190449	C/T
SNP1120	5	34234207	G/A
SNP1121	5	34294649	G/T
SNP1123	5	34570503	C/A
SNP1125	5	34692879	G/T
SNP1126	5	34734860	T/C
SNP1128	5	34765648	A/G
SNP1129	5	34801979	T/G
SNP1130	5	34830575	G/A
SNP1131	5	34887900	A/G
SNP1132	5	34939267	A/G
SNP1133	5	34976496	A/G
SNP1134	5	35039076	C/T
SNP1136	5	35103944	A/G
SNP1137	5	35152904	T/C
SNP1138	5	35196492	G/T
SNP1139	5	35326427	C/T
SNP1140	5	35368098	A/C
SNP1141	5	35450915	T/C
SNP1142	5	35518408	T/C
SNP1144	5	35690382	A/G
SNP1146	5	35724027	A/G
SNP1147	5	35754878	C/A
SNP1148	5	35788006	T/C
SNP1149	5	35860939	C/T
SNP1150	5	35992617	T/C
SNP1151	5	36028909	A/G
SNP1152	5	36055684	C/T
SNP1153	5	36115730	C/T
SNP1155	5	36196250	T/G
SNP1156	5	36393767	C/T
SNP1157	5	36429393	C/T
SNP1158	5	36465301	T/C
SNP1159	5	36558442	C/T
SNP1160	5	36626022	A/G
SNP1162	5	36671535	C/T
SNP1163	5	36749252	T/C
SNP1164	5	36769351	T/G
SNP1165	5	36849833	T/C
SNP1166	5	37027716	G/A
SNP1167	5	37043636	A/C
SNP1168	5	37071607	G/A
SNP1169	5	37115396	A/G
SNP1170	5	37194257	T/C
SNP1171	5	37260149	A/G
SNP1172	5	37305888	A/G
SNP1173	5	37409751	C/T
SNP1174	5	37480785	T/C
SNP1175	5	37592640	T/C
SNP1176	5	37611048	C/T
SNP1178	5	37650940	T/C
SNP1179	5	37696986	T/C
SNP1180	5	37744939	G/T
SNP1181	5	37834044	A/G
SNP1182	5	37848366	C/A
SNP1183	5	37990846	C/T
SNP1184	5	38036821	A/C
SNP1185	5	38073855	C/T
SNP1186	5	38098748	C/A
SNP1187	5	38231403	G/A
SNP1188	5	38259743	A/G
SNP1189	5	38453430	G/A
SNP1192	5	38596037	C/A
SNP1193	5	38636402	G/A
SNP1194	5	38674350	C/T
SNP1195	5	38703433	T/C
SNP1196	5	38950372	T/C
SNP1197	5	38995911	C/T
SNP1198	5	39021151	C/A
SNP1200	5	39054172	A/G
SNP1201	5	39083568	A/G
SNP1202	5	39273308	T/G
SNP1203	5	39341525	C/T
SNP1205	5	39402030	T/C
SNP1207	5	39643904	T/C
SNP1208	5	39655552	A/C
SNP1209	5	39858447	T/C
SNP1210	5	39924642	C/T
SNP1211	5	39995603	C/T
SNP1212	5	40044590	T/G
SNP1213	5	40147071	T/C
SNP1214	5	40169104	G/A
SNP1215	5	40299923	A/G
SNP1216	5	40349605	T/C
SNP1218	5	40452052	G/T
SNP1219	5	40517408	T/C
SNP1220	5	40528969	T/G
SNP1221	5	40642754	C/A
SNP1222	5	40791973	A/G
SNP1224	5	40824886	T/C
SNP1225	5	40919406	C/T
SNP1226	5	40942868	G/A
SNP1227	5	41066968	A/G
SNP1228	5	41151290	T/C
SNP1229	5	41186986	G/A
SNP1230	5	41240881	A/G
SNP1231	5	41344316	C/T
SNP1232	5	41394645	G/T
SNP1233	5	41446899	T/C
SNP1234	5	41481303	T/C
SNP1235	5	41638179	T/C
SNP1236	5	41658399	C/T
SNP1237	5	41740936	C/T
SNP1238	5	41866018	G/A
SNP1481	6	489058	C/A
SNP1491	6	496825	G/A
SNP1524	6	657590	T/G
SNP1532	6	732091	G/A
SNP1537	6	790146	T/G
SNP1549	6	909751	C/T
SNP1555	6	969495	G/T
SNP1275	6	1006528	G/A
SNP1286	6	1101232	T/C
SNP1297	6	1216803	A/C
SNP1303	6	1278224	C/T
SNP1310	6	1328895	T/C
SNP1318	6	1387164	A/G
SNP1327	6	1454403	A/C
SNP1334	6	1514202	T/C
SNP1347	6	1609551	C/T
SNP1353	6	1655912	T/G
SNP1361	6	1737718	C/T
SNP1374	6	2086304	T/C
SNP1380	6	2325487	G/T
SNP1382	6	2393421	A/G
SNP1384	6	2481084	A/G
SNP1387	6	2596995	A/G
SNP1388	6	2649771	A/G
SNP1391	6	2722611	C/T
SNP1397	6	3077486	G/A
SNP1399	6	3143746	T/C
SNP1401	6	3199735	A/G
SNP1404	6	3252579	T/C
SNP1405	6	3335673	A/G
SNP1407	6	3370143	T/C
SNP1411	6	3608127	T/C
SNP1421	6	3880702	G/T
SNP1423	6	3941524	A/G
SNP1428	6	4124078	G/A
SNP1430	6	4212222	A/G
SNP1435	6	4302100	C/T
SNP1440	6	4422517	A/G
SNP1444	6	4578291	T/G
SNP1450	6	4644965	G/A
SNP1473	6	4820133	A/G
SNP1495	6	4995087	A/G
SNP1504	6	5058345	A/G
SNP1507	6	5135025	A/G
SNP1508	6	5196308	T/C
SNP1509	6	5297183	G/A
SNP1510	6	5318544	T/C
SNP1516	6	5829396	G/A
SNP1517	6	5847946	T/G
SNP1518	6	5991160	A/G
SNP1519	6	6094090	G/T
SNP1520	6	6141525	A/C
SNP1523	6	6488212	A/C
SNP1525	6	6576054	G/A
SNP1526	6	6710662	G/A
SNP1527	6	6797764	C/T
SNP1528	6	6838468	A/C
SNP1529	6	6914278	T/C
SNP1530	6	7072768	A/G
SNP1531	6	7259462	T/C
SNP1534	6	7683418	G/A
SNP1535	6	7756576	G/A
SNP1536	6	7836214	T/C
SNP1538	6	7918219	C/T
SNP1539	6	8015415	G/T
SNP1540	6	8079300	T/C
SNP1543	6	8338093	G/A
SNP1544	6	8483050	C/T
SNP1547	6	8979504	A/G
SNP1548	6	9081030	C/A
SNP1551	6	9216536	A/C
SNP1552	6	9263869	A/C
SNP1553	6	9442481	T/C
SNP1554	6	9668798	T/C
SNP1556	6	9756999	T/C
SNP1557	6	9803356	C/T
SNP1558	6	9952410	T/C
SNP1276	6	10124470	T/C
SNP1277	6	10240897	T/C
SNP1278	6	10324739	T/G
SNP1279	6	10383065	G/A
SNP1280	6	10464340	G/A
SNP1281	6	10693310	G/A
SNP1282	6	10781518	T/C
SNP1283	6	10823424	C/T
SNP1284	6	10891060	T/C
SNP1285	6	10993554	A/G
SNP1287	6	11098210	C/T
SNP1288	6	11165149	C/T
SNP1289	6	11243298	G/T
SNP1290	6	11333769	G/A
SNP1291	6	11479872	T/C
SNP1292	6	11659627	A/G
SNP1293	6	11786580	T/G
SNP1294	6	11844498	A/G
SNP1295	6	11948808	G/A
SNP1299	6	12252031	C/T
SNP1300	6	12346248	C/T
SNP1301	6	12414435	G/A
SNP1302	6	12544455	A/G
SNP1304	6	12816666	A/G
SNP1305	6	12914255	A/G
SNP1306	6	12963850	T/C
SNP1307	6	13008773	A/G
SNP1308	6	13193350	G/A
SNP1309	6	13237698	A/G
SNP1311	6	13318948	A/G
SNP1312	6	13401987	C/T
SNP1313	6	13472059	A/G
SNP1314	6	13528200	T/C
SNP1315	6	13621986	A/C
SNP1316	6	13732043	T/C
SNP1317	6	13811298	C/T
SNP1319	6	13881657	A/G
SNP1320	6	14058543	A/C
SNP1321	6	14138713	C/A
SNP1322	6	14238413	A/C
SNP1323	6	14321140	T/C
SNP1324	6	14359453	T/C
SNP1325	6	14452528	G/A
SNP1326	6	14511744	T/C
SNP1328	6	14682231	T/C
SNP1329	6	14737902	A/G
SNP1330	6	14859364	A/C
SNP1331	6	14924961	T/C
SNP1332	6	15032691	A/G
SNP1333	6	15115808	C/T
SNP1335	6	15189169	G/T
SNP1336	6	15242800	T/C
SNP1337	6	15288970	G/A
SNP1338	6	15376751	G/A
SNP1339	6	15453344	A/G
SNP1340	6	15571070	T/C
SNP1341	6	15702934	A/G
SNP1342	6	15793203	T/C
SNP1343	6	15847484	A/C
SNP1344	6	15910152	A/G
SNP1345	6	15960829	C/A
SNP1346	6	16084283	C/T
SNP1348	6	16133328	G/A
SNP1349	6	16207402	T/C
SNP1350	6	16315206	A/G
SNP1351	6	16372276	T/C
SNP1352	6	16390152	A/G
SNP1354	6	16669594	G/T
SNP1355	6	16745340	A/G
SNP1356	6	16792113	T/C
SNP1357	6	16853739	A/C
SNP1358	6	16923935	T/C
SNP1359	6	17188046	A/G
SNP1360	6	17356033	G/A
SNP1362	6	17399306	A/C
SNP1363	6	17617727	G/T
SNP1364	6	18033759	A/G
SNP1365	6	18252495	T/C
SNP1366	6	18447419	G/A
SNP1367	6	18583273	A/C
SNP1368	6	18766611	C/T
SNP1369	6	19282687	A/G
SNP1370	6	19540686	C/T
SNP1371	6	20152926	T/C
SNP1373	6	20486758	C/A
SNP1375	6	20943239	T/C
SNP1377	6	21567013	G/A
SNP1378	6	22271239	C/T
SNP1381	6	23462870	C/T
SNP1383	6	24160775	C/T
SNP1385	6	25704938	T/C
SNP1386	6	25799930	T/C
SNP1389	6	26933523	C/T
SNP1390	6	26981990	G/T
SNP1392	6	28315232	G/A
SNP1393	6	28816949	A/G
SNP1395	6	30260912	A/G
SNP1398	6	31288514	A/C
SNP1400	6	31863080	C/T
SNP1403	6	32525220	G/T
SNP1406	6	33615663	G/A
SNP1409	6	34966793	A/G
SNP1410	6	36058154	C/T
SNP1412	6	36128279	T/C
SNP1413	6	37017961	A/G
SNP1414	6	37364558	A/C
SNP1415	6	37485859	A/G
SNP1416	6	37732009	A/G
SNP1417	6	37823440	T/C
SNP1418	6	38232188	C/A
SNP1419	6	38499465	G/A
SNP1420	6	38703918	T/C
SNP1422	6	38999119	T/C
SNP1424	6	39421942	C/T
SNP1425	6	40454884	C/T
SNP1426	6	40671903	G/A
SNP1427	6	40878788	C/T
SNP1429	6	41268682	G/T
SNP1431	6	42308631	A/C
SNP1432	6	42515359	A/G
SNP1433	6	42707931	T/G
SNP1434	6	42883965	T/C
SNP1436	6	43235059	C/T
SNP1437	6	43432590	G/A
SNP1438	6	43688393	A/G
SNP1439	6	43980786	G/A
SNP1441	6	44474853	A/G
SNP1442	6	44964380	T/C
SNP1443	6	45768166	A/G
SNP1445	6	46186757	C/T
SNP1446	6	46271407	G/A
SNP1447	6	46321637	C/T
SNP1448	6	46375359	G/A
SNP1449	6	46425973	T/C
SNP1451	6	46564658	C/A
SNP1452	6	46677140	C/T
SNP1453	6	46790136	C/T
SNP1454	6	46905460	G/A
SNP1455	6	46970966	C/T
SNP1456	6	47026169	C/A
SNP1457	6	47063453	G/T
SNP1458	6	47191346	C/T
SNP1459	6	47238226	A/G
SNP1460	6	47338142	T/G
SNP1461	6	47402504	A/G
SNP1462	6	47439414	C/T
SNP1463	6	47550354	A/G
SNP1464	6	47631544	T/C
SNP1465	6	47723155	T/C
SNP1466	6	47764344	C/T
SNP1467	6	47823144	T/G
SNP1468	6	47918999	G/A
SNP1469	6	47987101	G/T
SNP1470	6	48037370	T/G
SNP1471	6	48098064	A/C
SNP1472	6	48144110	G/A
SNP1474	6	48261084	C/A
SNP1476	6	48528885	G/T
SNP1477	6	48582951	G/A
SNP1478	6	48699388	T/G
SNP1479	6	48785257	T/C
SNP1480	6	48829470	C/T
SNP1482	6	48988513	T/C
SNP1483	6	49106015	C/T
SNP1484	6	49209907	C/T
SNP1485	6	49330690	G/T
SNP1486	6	49343224	G/T
SNP1488	6	49511605	T/C
SNP1489	6	49570784	G/A
SNP1490	6	49643463	G/A
SNP1492	6	49722118	A/G
SNP1493	6	49792083	T/C
SNP1494	6	49915592	A/C
SNP1496	6	50038514	T/C
SNP1497	6	50100354	G/T
SNP1498	6	50143995	A/G
SNP1499	6	50217611	T/C
SNP1500	6	50261723	A/G
SNP1501	6	50397370	T/C
SNP1502	6	50453859	A/G
SNP1503	6	50494802	A/G
SNP1505	6	50593128	T/G
SNP1506	6	50641085	C/T
SNP1592	7	151038	A/C
SNP1626	7	185603	C/T
SNP1644	7	260352	G/A
SNP1658	7	308906	G/A
SNP1762	7	439872	A/G
SNP1777	7	527869	G/T
SNP1781	7	562809	G/A
SNP1797	7	675190	G/A
SNP1846	7	954565	G/A
SNP1563	7	1034903	T/C
SNP1570	7	1119462	A/G
SNP1575	7	1182465	T/C
SNP1577	7	1246890	T/G
SNP1579	7	1295060	G/A
SNP1580	7	1336323	A/G
SNP1581	7	1382983	T/G
SNP1583	7	1421810	A/G
SNP1596	7	1534291	G/A
SNP1601	7	1574673	G/A
SNP1609	7	1630335	G/A
SNP1628	7	2041455	A/C
SNP1635	7	2267894	G/A
SNP1637	7	2302804	A/G
SNP1639	7	2418465	A/G
SNP1642	7	2512664	A/G
SNP1643	7	2580303	T/G
SNP1645	7	2646409	C/T
SNP1647	7	2740071	G/A
SNP1649	7	2784908	G/A
SNP1651	7	2814243	A/G
SNP1653	7	2929896	C/T
SNP1656	7	3042699	C/T
SNP1660	7	3143196	C/T
SNP1661	7	3147674	G/A
SNP1663	7	3281799	T/G
SNP1664	7	3318193	T/C
SNP1667	7	3390461	G/A
SNP1669	7	3440069	T/C
SNP1688	7	3685427	G/A
SNP1712	7	3845105	A/C
SNP1724	7	3953270	T/C
SNP1726	7	3990308	A/G
SNP1766	7	4487138	C/A
SNP1767	7	4562451	T/C
SNP1768	7	4639245	T/C
SNP1770	7	4837493	A/G
SNP1771	7	4921108	G/A
SNP1772	7	4968383	C/T
SNP1773	7	5014895	T/G
SNP1774	7	5097877	A/C
SNP1775	7	5152231	A/G
SNP1776	7	5226366	C/T
SNP1778	7	5352313	T/C
SNP1779	7	5417760	T/C
SNP1780	7	5490895	G/T
SNP1782	7	5636973	T/C
SNP1783	7	5863012	C/A
SNP1784	7	5900018	A/G
SNP1785	7	5944283	A/G
SNP1786	7	5989451	C/T
SNP1787	7	6069607	G/A
SNP1788	7	6124850	C/T
SNP1789	7	6161800	A/G
SNP1790	7	6352113	T/G
SNP1791	7	6405598	A/G
SNP1792	7	6452520	T/C
SNP1793	7	6521175	T/C
SNP1794	7	6555810	T/C
SNP1795	7	6604493	G/A
SNP1796	7	6726514	G/A
SNP1798	7	6781309	T/C
SNP1799	7	6859582	A/G
SNP1800	7	6947362	A/G
SNP1801	7	6986674	G/A
SNP1802	7	7032715	G/A
SNP1803	7	7096376	G/T
SNP1804	7	7160924	T/C
SNP1805	7	7207534	C/T
SNP1807	7	7284474	A/G
SNP1808	7	7369745	C/T
SNP1809	7	7489377	T/C
SNP1810	7	7505701	A/G
SNP1811	7	7579367	G/A
SNP1812	7	7618698	T/C
SNP1813	7	7666127	T/C
SNP1814	7	7732175	G/A
SNP1815	7	7812393	C/T
SNP1816	7	7913364	T/C
SNP1817	7	7950118	A/G
SNP1818	7	7984980	G/T
SNP1819	7	8018299	A/G
SNP1820	7	8112122	C/T
SNP1821	7	8166605	T/C
SNP1822	7	8212204	A/G
SNP1824	7	8327392	G/A
SNP1825	7	8385653	T/C
SNP1826	7	8419994	A/G
SNP1827	7	8488086	A/G
SNP1828	7	8535939	T/C
SNP1830	7	8591371	G/A
SNP1831	7	8657083	C/T
SNP1832	7	8698310	G/A
SNP1833	7	8748742	C/T
SNP1834	7	8887938	C/T
SNP1835	7	8928954	G/A
SNP1836	7	8966079	T/G
SNP1837	7	9006025	G/A
SNP1838	7	9057074	G/A
SNP1839	7	9102516	A/G
SNP1840	7	9267799	G/A
SNP1841	7	9305234	A/G
SNP1843	7	9402863	A/G
SNP1844	7	9452257	T/C
SNP1845	7	9535678	A/G
SNP1847	7	9628835	G/A
SNP1848	7	9684260	C/T
SNP1849	7	9774687	G/A
SNP1850	7	9800952	A/G
SNP1851	7	9863864	A/C
SNP1559	7	10009107	G/A
SNP1560	7	10117575	G/A
SNP1561	7	10193199	G/A
SNP1562	7	10236359	A/G
SNP1564	7	10403810	C/T
SNP1565	7	10451670	C/T
SNP1566	7	10806729	G/A
SNP1567	7	10926994	A/G
SNP1568	7	10967802	C/T
SNP1569	7	11153441	A/G
SNP1571	7	11218843	C/T
SNP1572	7	11517990	A/G
SNP1573	7	11707828	T/C
SNP1574	7	11762657	T/C
SNP1576	7	11956773	T/C
SNP1578	7	12858110	C/A
SNP1582	7	14090959	A/G
SNP1584	7	14256111	T/C
SNP1585	7	14552113	T/G
SNP1586	7	14748407	G/T
SNP1587	7	14830454	T/C
SNP1588	7	14862607	C/T
SNP1589	7	14979158	T/C
SNP1590	7	15017830	C/T
SNP1591	7	15085661	G/A
SNP1593	7	15137575	A/G
SNP1594	7	15181335	A/C
SNP1595	7	15330002	C/A
SNP1597	7	15394475	T/C
SNP1598	7	15590266	C/T
SNP1599	7	15663842	T/C
SNP1600	7	15717199	G/T
SNP1602	7	15748996	T/G
SNP1603	7	15800472	A/G
SNP1604	7	15870753	C/A
SNP1605	7	16020670	G/T
SNP1606	7	16031010	C/T
SNP1607	7	16100034	C/T
SNP1608	7	16155436	G/A
SNP1610	7	16393117	A/G
SNP1611	7	16438076	A/G
SNP1613	7	16532107	A/G
SNP1615	7	16702758	C/T
SNP1616	7	16809664	A/G
SNP1617	7	16937302	T/C
SNP1618	7	16979586	C/T
SNP1620	7	17095590	C/T
SNP1621	7	17362808	A/G
SNP1623	7	17615932	A/G
SNP1625	7	18293045	C/T
SNP1627	7	18633505	T/C
SNP1629	7	20527016	C/T
SNP1631	7	21193861	G/A
SNP1632	7	21217603	T/C
SNP1634	7	22668340	A/G
SNP1636	7	22686796	T/C
SNP1638	7	23710284	A/G
SNP1640	7	24197913	T/G
SNP1641	7	24960162	C/A
SNP1646	7	26960074	A/G
SNP1648	7	27445113	A/G
SNP1652	7	28865848	T/C
SNP1654	7	29330183	G/A
SNP1655	7	30018015	T/C
SNP1659	7	31363791	T/C
SNP1662	7	32588864	T/C
SNP1665	7	33333813	T/C
SNP1666	7	33718140	A/G
SNP1670	7	34580678	G/A
SNP1671	7	35142318	A/G
SNP1672	7	35194991	A/G
SNP1673	7	35547398	T/C
SNP1674	7	35619623	G/A
SNP1676	7	35809061	C/T
SNP1677	7	35908169	T/C
SNP1678	7	35992034	T/G
SNP1679	7	36094482	T/G
SNP1680	7	36151607	T/G
SNP1682	7	36285014	A/G
SNP1683	7	36357080	T/C
SNP1684	7	36551753	A/G
SNP1685	7	36605671	C/T
SNP1687	7	36782624	T/G
SNP1689	7	36875730	T/C
SNP1690	7	36886320	G/T
SNP1691	7	36998381	T/C
SNP1692	7	37038775	T/C
SNP1693	7	37096617	A/G
SNP1694	7	37143613	T/C
SNP1695	7	37193303	C/T
SNP1697	7	37260926	G/A
SNP1698	7	37272144	G/T
SNP1699	7	37374894	A/C
SNP1700	7	37416258	G/A
SNP1701	7	37543006	A/G
SNP1702	7	37710555	C/T
SNP1703	7	37813869	A/G
SNP1704	7	37876224	T/C
SNP1705	7	37983142	C/A
SNP1706	7	38106438	A/C
SNP1707	7	38146847	A/C
SNP1708	7	38182939	A/C
SNP1709	7	38241521	T/C
SNP1710	7	38334707	G/A
SNP1711	7	38429072	C/T
SNP1713	7	38543266	G/A
SNP1714	7	38594738	T/C
SNP1715	7	38631457	T/C
SNP1716	7	38690419	T/C
SNP1717	7	38811817	A/G
SNP1718	7	38861000	C/T
SNP1719	7	38941177	A/C
SNP1720	7	38991567	G/A
SNP1721	7	39048655	G/A
SNP1722	7	39160931	A/G
SNP1723	7	39225759	C/T
SNP1725	7	39819949	C/T
SNP1727	7	40348942	A/G
SNP1728	7	40447348	A/G
SNP1729	7	40550203	G/A
SNP1730	7	40621014	G/A
SNP1731	7	40784182	T/G
SNP1732	7	40945201	C/T
SNP1736	7	41892346	A/G
SNP1738	7	42102555	A/G
SNP1739	7	42275940	A/C
SNP1740	7	42377015	T/C
SNP1742	7	42450573	A/G
SNP1743	7	42514160	T/G
SNP1744	7	42643191	A/G
SNP1746	7	42787114	G/T
SNP1747	7	42851461	T/C
SNP1748	7	42923420	G/A
SNP1749	7	42963672	C/A
SNP1751	7	43067274	G/T
SNP1752	7	43182856	G/A
SNP1753	7	43189903	A/G
SNP1754	7	43311703	G/A
SNP1755	7	43506682	A/G
SNP1756	7	43581535	A/G
SNP1757	7	43653918	A/G
SNP1758	7	43803821	T/C
SNP1760	7	43878840	C/T
SNP1761	7	43946876	A/G
SNP1763	7	44360334	A/C
SNP1764	7	44451098	G/A
SNP1765	7	44621109	A/G
SNP1879	8	1187744	C/A
SNP1902	8	1370837	G/A
SNP1921	8	1504393	C/T
SNP1926	8	1550356	T/C
SNP1937	8	1622175	T/C
SNP1964	8	1817703	A/G
SNP1975	8	1882181	A/G
SNP1981	8	1923992	T/C
SNP1986	8	1970033	T/C
SNP1991	8	2041076	C/T
SNP1998	8	2119913	T/C
SNP2008	8	2254106	G/A
SNP2012	8	2288307	A/G
SNP2016	8	2341591	G/A
SNP2019	8	2394647	G/A
SNP2020	8	2467547	G/T
SNP2023	8	2547323	A/G
SNP2025	8	2622664	T/C
SNP2027	8	2671408	T/C
SNP2030	8	2837248	T/C
SNP2033	8	3018731	A/C
SNP2036	8	3178655	C/A
SNP2037	8	3272385	G/T
SNP2038	8	3285222	T/C
SNP2039	8	3369110	G/A
SNP2043	8	3519477	A/G
SNP2063	8	3985008	T/C
SNP2101	8	4266625	A/C
SNP2151	8	4667338	C/T
SNP2155	8	4747497	G/T
SNP2156	8	4873149	C/T
SNP2157	8	4882276	A/G
SNP2158	8	4959623	T/C
SNP2159	8	5003648	C/T
SNP2160	8	5082382	G/T
SNP2161	8	5278800	G/T
SNP2163	8	5701842	C/T
SNP2166	8	6188267	T/G
SNP2171	8	7103134	G/A
SNP2172	8	7180829	T/G
SNP2173	8	7418586	T/C
SNP2174	8	7512536	C/T
SNP2175	8	7567751	G/A
SNP2176	8	7648192	A/G
SNP2177	8	7714968	T/C
SNP2178	8	7780581	G/A
SNP2179	8	7817865	A/G
SNP2180	8	7876754	T/C
SNP2181	8	7955652	G/A
SNP2182	8	7989547	G/T
SNP2183	8	8043785	T/C
SNP2184	8	8268861	A/C
SNP2185	8	8305965	T/C
SNP2186	8	8396392	A/G
SNP2187	8	8483831	T/C
SNP2188	8	8541523	G/T
SNP2189	8	8577294	A/G
SNP2191	8	8695745	A/C
SNP2192	8	8803704	A/C
SNP2194	8	9029887	C/T
SNP2195	8	9111316	G/A
SNP2196	8	9179927	T/C
SNP2197	8	9227563	G/A
SNP2198	8	9339433	A/C
SNP2199	8	9436305	A/G
SNP2200	8	9484695	T/C
SNP2201	8	9597333	T/C
SNP2202	8	9634993	A/C
SNP2203	8	9700052	T/G
SNP2204	8	9741542	T/C
SNP2205	8	9789047	T/C
SNP2207	8	9885021	T/C
SNP2208	8	9970013	G/T
SNP1854	8	10116360	C/T
SNP1855	8	10172600	G/A
SNP1856	8	10303031	C/T
SNP1857	8	10330658	A/C
SNP1858	8	10418912	C/T
SNP1859	8	10570097	C/T
SNP1860	8	10621107	C/A
SNP1861	8	10670190	C/T
SNP1862	8	10735245	T/G
SNP1863	8	10789902	T/C
SNP1864	8	10850793	C/A
SNP1865	8	10947242	C/T
SNP1866	8	11052135	C/T
SNP1867	8	11073425	T/G
SNP1868	8	11215154	C/T
SNP1869	8	11257840	T/C
SNP1870	8	11359720	A/G
SNP1871	8	11451417	C/T
SNP1872	8	11501419	A/C
SNP1873	8	11560988	T/C
SNP1874	8	11643406	C/T
SNP1875	8	11685418	C/T
SNP1876	8	11730256	T/C
SNP1877	8	11759489	C/T
SNP1878	8	11864710	G/A
SNP1880	8	11971416	C/T
SNP1881	8	12055669	A/G
SNP1882	8	12189320	G/A
SNP1883	8	12251183	T/C
SNP1884	8	12309919	A/G
SNP1885	8	12392887	C/T
SNP1886	8	12475844	A/C
SNP1887	8	12513720	C/T
SNP1888	8	12574842	C/A
SNP1889	8	12660080	C/A
SNP1890	8	12714510	T/C
SNP1891	8	12869977	G/A
SNP1892	8	12971742	G/A
SNP1893	8	13040141	A/G
SNP1894	8	13109130	A/G
SNP1895	8	13198471	C/T
SNP1896	8	13236059	C/A
SNP1897	8	13311178	A/G
SNP1898	8	13348835	C/T
SNP1899	8	13459269	T/G
SNP1900	8	13581113	A/C
SNP1901	8	13640846	A/G
SNP1903	8	13782412	C/T
SNP1904	8	13880758	T/C
SNP1905	8	13914377	A/G
SNP1906	8	13959439	T/C
SNP1907	8	14004130	G/A
SNP1908	8	14198186	G/T
SNP1909	8	14233959	A/C
SNP1910	8	14353179	A/C
SNP1911	8	14431777	C/A
SNP1914	8	14547171	T/C
SNP1915	8	14646649	A/G
SNP1916	8	14709181	C/A
SNP1917	8	14742607	A/C
SNP1918	8	14781850	T/C
SNP1919	8	14833954	G/A
SNP1922	8	15131577	A/G
SNP1923	8	15153503	G/T
SNP1924	8	15193841	T/C
SNP1925	8	15386438	A/G
SNP1927	8	15538275	A/C
SNP1928	8	15573572	T/G
SNP1930	8	15675506	A/C
SNP1931	8	15728680	T/C
SNP1932	8	15829093	T/G
SNP1933	8	15862930	A/C
SNP1934	8	15928921	A/G
SNP1935	8	16170136	C/A
SNP1936	8	16206984	A/G
SNP1938	8	16256510	A/C
SNP1939	8	16290836	T/C
SNP1940	8	16340916	T/G
SNP1941	8	16378273	G/A
SNP1942	8	16516580	A/G
SNP1943	8	16683505	C/T
SNP1944	8	16790002	C/A
SNP1945	8	16823465	A/C
SNP1946	8	16860906	T/C
SNP1947	8	16901934	C/T
SNP1948	8	16964379	T/C
SNP1949	8	17019955	C/T
SNP1950	8	17083426	A/G
SNP1951	8	17171212	G/A
SNP1952	8	17273651	T/C
SNP1953	8	17307109	T/C
SNP1954	8	17354374	G/T
SNP1955	8	17399376	A/G
SNP1956	8	17444010	T/G
SNP1957	8	17484510	T/C
SNP1958	8	17529249	G/T
SNP1959	8	17579484	C/T
SNP1960	8	17718826	A/G
SNP1961	8	17813383	C/T
SNP1962	8	17928709	C/T
SNP1963	8	18101486	A/G
SNP1965	8	18177939	C/T
SNP1966	8	18225805	A/G
SNP1967	8	18282721	T/C
SNP1968	8	18319356	G/A
SNP1969	8	18379278	T/C
SNP1970	8	18443609	T/C
SNP1971	8	18550866	C/T
SNP1972	8	18626336	C/T
SNP1973	8	18714236	C/T
SNP1974	8	18748606	T/G
SNP1976	8	18909193	A/G
SNP1977	8	19117033	T/C
SNP1978	8	19162244	T/C
SNP1979	8	19189540	G/A
SNP1980	8	19226069	A/G
SNP1982	8	19292385	T/C
SNP1983	8	19414487	A/G
SNP1984	8	19525771	A/G
SNP1985	8	19635121	T/C
SNP1987	8	19793746	C/T
SNP1988	8	19835719	T/G
SNP1989	8	19887196	G/A
SNP1990	8	20123542	G/A
SNP1992	8	20483450	C/T
SNP1993	8	20536534	C/T
SNP1996	8	21170988	C/T
SNP1997	8	21172458	T/C
SNP1999	8	21362406	C/T
SNP2000	8	21425355	G/A
SNP2001	8	21443387	G/T
SNP2002	8	21875763	A/G
SNP2003	8	21933156	G/A
SNP2004	8	22013366	G/A
SNP2005	8	22123551	G/A
SNP2006	8	22502686	T/C
SNP2007	8	22530478	G/T
SNP2009	8	22566050	A/G
SNP2010	8	22622648	A/G
SNP2011	8	22702507	C/T
SNP2013	8	23073352	T/C
SNP2015	8	23245678	A/G
SNP2017	8	23639196	T/G
SNP2018	8	23691942	G/A
SNP2021	8	24919328	G/A
SNP2022	8	25219400	A/G
SNP2024	8	25518395	C/A
SNP2028	8	27721821	G/A
SNP2029	8	28027433	T/C
SNP2031	8	29497457	C/A
SNP2034	8	30225439	G/A
SNP2035	8	30750199	A/G
SNP2040	8	34085111	C/T
SNP2041	8	34506326	G/A
SNP2042	8	35102127	G/A
SNP2044	8	35467148	T/C
SNP2045	8	35664370	C/T
SNP2046	8	35856368	C/A
SNP2048	8	36324664	T/C
SNP2049	8	36540268	T/C
SNP2050	8	36881358	A/C
SNP2051	8	37464144	A/G
SNP2053	8	38044939	A/G
SNP2055	8	38534870	A/G
SNP2056	8	38670102	G/A
SNP2057	8	38965668	G/A
SNP2058	8	39164008	C/T
SNP2059	8	39378435	C/T
SNP2060	8	39453750	G/A
SNP2061	8	39543860	T/C
SNP2062	8	39819141	A/G
SNP2064	8	39859858	T/C
SNP2065	8	39969061	C/T
SNP2066	8	40012659	C/T
SNP2067	8	40066964	A/G
SNP2068	8	40173645	T/C
SNP2069	8	40220221	A/G
SNP2070	8	40303964	C/T
SNP2071	8	40345085	C/A
SNP2072	8	40401190	A/G
SNP2073	8	40589333	T/C
SNP2074	8	40670305	A/G
SNP2075	8	40735987	T/C
SNP2076	8	40841096	T/C
SNP2077	8	40882335	A/G
SNP2078	8	40953721	T/G
SNP2079	8	40997656	A/G
SNP2080	8	41061744	C/T
SNP2081	8	41126169	A/C
SNP2082	8	41191912	A/G
SNP2083	8	41254477	G/T
SNP2084	8	41318101	A/G
SNP2085	8	41427473	A/G
SNP2086	8	41504420	T/C
SNP2087	8	41553888	G/T
SNP2088	8	41615045	T/C
SNP2089	8	41693863	A/G
SNP2090	8	41740263	C/T
SNP2091	8	41798055	A/G
SNP2092	8	41844881	T/C
SNP2093	8	41883157	A/G
SNP2095	8	42210099	C/T
SNP2096	8	42292068	G/A
SNP2097	8	42368016	C/T
SNP2098	8	42457562	G/A
SNP2099	8	42541896	C/A
SNP2100	8	42593496	G/T
SNP2102	8	42711337	T/C
SNP2103	8	42757127	T/G
SNP2104	8	42793022	A/G
SNP2105	8	42859155	A/G
[truncated: 3,022 more rows]

## Sheet: Table B
Table B: Positions of haplotype blocks in the 169 tropical soybean cultivars. Data include the chromosome, the bp start and end positions of the haplotype block, the size in kbp of the haplotype block, the number of SNPs in the haplotype block based on the Glyma1.01 genome assembly.
	Chromosome	Start position	End position	Size (kb)	Number of SNPs
	Gm01	281790	402061	120.271	2
	Gm01	565991	688663	122.672	2
	Gm01	901691	963847	62.156	2
	Gm01	1344976	1653315	308.339	4
	Gm01	2708722	2813785	105.063	2
	Gm01	3327321	3596804	269.483	6
	Gm01	3638269	3905200	266.931	4
	Gm01	4120447	4474392	353.945	4
	Gm01	27164384	27463902	299.518	2
	Gm01	28628358	28848622	220.264	3
	Gm01	31506268	31906055	399.787	2
	Gm01	39561856	39803394	241.538	3
	Gm01	40195425	40455897	260.472	3
	Gm01	42848317	43254220	405.903	3
	Gm01	47942462	48181097	238.635	3
	Gm01	48469239	48860794	391.555	7
	Gm01	49029066	49322760	293.694	5
	Gm01	49403702	49566893	163.191	3
	Gm01	49687691	49770288	82.597	2
	Gm01	49912586	50035662	123.076	3
	Gm01	50098348	50262496	164.148	3
	Gm01	50423856	50507289	83.433	2
	Gm01	50644671	51034693	390.022	4
	Gm01	51330200	51636488	306.288	3
	Gm01	51831718	52154366	322.648	4
	Gm01	52551516	52642507	90.991	2
	Gm01	53242363	53278791	36.428	2
	Gm01	53675540	54025362	349.822	4
	Gm01	54123492	54521885	398.393	7
	Gm01	54622722	54843428	220.706	5
	Gm01	54932021	55226574	294.553	5
	Gm01	55380880	55789200	408.32	3
	Gm02	51238	207506	156.268	2
	Gm02	447495	769809	322.314	5
	Gm02	831797	1033642	201.845	4
	Gm02	1517184	1878469	361.285	4
	Gm02	2158660	2246479	87.819	2
	Gm02	2320070	2467152	147.082	3
	Gm02	2736727	2834472	97.745	2
	Gm02	3091665	3429963	338.298	4
	Gm02	3594255	3644248	49.993	2
	Gm02	3860736	3906107	45.371	2
	Gm02	3954305	4283009	328.704	4
	Gm02	4319761	4439399	119.638	3
	Gm02	4487187	4618881	131.694	2
	Gm02	4688093	4909353	221.26	3
	Gm02	4957187	5155733	198.546	2
	Gm02	5456974	5595797	138.823	2
	Gm02	5809648	5929459	119.811	2
	Gm02	6180795	6503793	322.998	4
	Gm02	6734421	6821311	86.89	2
	Gm02	6971683	7333018	361.335	2
	Gm02	7517197	7987834	470.637	5
	Gm02	8455103	8730196	275.093	4
	Gm02	9025221	9370878	345.657	5
	Gm02	9592601	9990067	397.466	5
	Gm02	10074856	10140292	65.436	2
	Gm02	10200610	10373210	172.6	4
	Gm02	10536842	10954777	417.935	5
	Gm02	11042236	11257077	214.841	3
	Gm02	11540598	11628896	88.298	2
	Gm02	11638087	12078209	440.122	4
	Gm02	12168684	12303360	134.676	3
	Gm02	12682738	13117615	434.877	3
	Gm02	13476678	13963693	487.015	3
	Gm02	14127417	14508130	380.713	6
	Gm02	14561578	14715495	153.917	2
	Gm02	30250662	30439101	188.439	2
	Gm02	31905028	32346915	441.887	2
	Gm02	32487728	32904473	416.745	4
	Gm02	33117418	33608259	490.841	2
	Gm02	34381583	34765594	384.011	2
	Gm02	36300454	36666688	366.234	2
	Gm02	38843686	39299266	455.58	2
	Gm02	39548191	40019470	471.279	3
	Gm02	40730869	41021889	291.02	2
	Gm02	41481689	41979401	497.712	7
	Gm02	42073855	42204732	130.877	2
	Gm02	42788887	43139891	351.004	4
	Gm02	43641969	43889571	247.602	4
	Gm02	44033150	44190678	157.528	4
	Gm02	44354376	44510528	156.152	4
	Gm02	44863895	45162941	299.046	4
	Gm02	45183828	45533271	349.443	5
	Gm02	45596920	45940601	343.681	4
	Gm02	46023727	46504621	480.894	5
	Gm02	46555984	46778366	222.382	2
	Gm02	46855228	47268207	412.979	4
	Gm02	47314350	47528737	214.387	4
	Gm02	47991459	48382122	390.663	5
	Gm02	48583877	48702118	118.241	3
	Gm02	48821067	49126947	305.88	4
	Gm02	49388210	49727178	338.968	4
	Gm02	49776196	50175034	398.838	3
	Gm02	50304676	50383419	78.743	3
	Gm02	50706913	50936574	229.661	2
	Gm02	51025014	51154756	129.742	2
	Gm02	51411364	51429037	17.673	2
	Gm03	206707	241447	34.74	2
	Gm03	345478	566774	221.296	3
	Gm03	785680	949581	163.901	3
	Gm03	1077329	1209205	131.876	2
	Gm03	1302748	1441844	139.096	3
	Gm03	1583754	2024899	441.145	8
	Gm03	2373742	2818076	444.334	3
	Gm03	3087237	3334303	247.066	4
	Gm03	3828735	3907697	78.962	2
	Gm03	4468196	4578272	110.076	2
	Gm03	4665923	5106459	440.536	4
	Gm03	5217414	5451606	234.192	3
	Gm03	8228940	8434431	205.491	2
	Gm03	10408873	10552078	143.205	2
	Gm03	10982565	11396505	413.94	2
	Gm03	13015481	13245008	229.527	2
	Gm03	16281390	16612828	331.438	2
	Gm03	18113789	18512439	398.65	3
	Gm03	22189671	22371830	182.159	3
	Gm03	27021460	27285377	263.917	2
	Gm03	27566511	28015945	449.434	2
	Gm03	29074893	29375217	300.324	2
	Gm03	30529089	30955790	426.701	3
	Gm03	35201990	35516341	314.351	3
	Gm03	35913889	35968599	54.71	2
	Gm03	36058927	36438792	379.865	6
	Gm03	36489202	36863476	374.274	5
	Gm03	36969159	37146641	177.482	3
	Gm03	37245981	37488779	242.798	6
	Gm03	37654429	37963252	308.823	6
	Gm03	38173815	38526701	352.886	4
	Gm03	38761991	38976026	214.035	4
	Gm03	39491355	39915523	424.168	5
	Gm03	39945298	40417269	471.971	7
	Gm03	40613405	40663609	50.204	2
	Gm03	41020834	41135466	114.632	2
	Gm03	41984976	42223337	238.361	3
	Gm03	42308865	42595334	286.469	2
	Gm03	43504459	43707104	202.645	4
	Gm03	44019995	44475419	455.424	3
	Gm03	44693761	44920668	226.907	2
	Gm03	45217524	45488992	271.468	3
	Gm03	45614970	45668212	53.242	2
	Gm03	46055685	46214163	158.478	3
	Gm03	46337339	46592189	254.85	5
	Gm03	46889507	47106922	217.415	4
	Gm03	47212539	47386481	173.942	3
	Gm04	10805	456406	445.601	4
	Gm04	516796	622489	105.693	3
	Gm04	1930897	2268644	337.747	4
	Gm04	2574201	2681971	107.77	3
	Gm04	4841626	5279327	437.701	4
	Gm04	5750694	6013342	262.648	3
	Gm04	8004029	8126739	122.71	3
	Gm04	8317828	8760004	442.176	5
	Gm04	8845668	9334751	489.083	6
	Gm04	9464579	9824083	359.504	5
	Gm04	11138059	11433919	295.86	2
	Gm04	11936288	12410533	474.245	4
	Gm04	13022455	13509340	486.885	3
	Gm04	14549891	15048603	498.712	3
	Gm04	17773168	18000454	227.286	2
	Gm04	20729591	20921247	191.656	3
	Gm04	24086337	24276060	189.723	2
	Gm04	28018833	28121297	102.464	2
	Gm04	37126858	37474521	347.663	2
	Gm04	37799809	38135736	335.927	2
	Gm04	38840391	39087487	247.096	2
	Gm04	40345917	40398866	52.949	2
	Gm04	40811025	41249369	438.344	3
	Gm04	41328216	41537794	209.578	2
	Gm04	42153936	42290567	136.631	2
	Gm04	42638631	43002324	363.693	4
	Gm04	43058492	43059665	1.173	2
	Gm04	43157873	43505831	347.958	2
	Gm04	43645980	43800862	154.882	2
	Gm04	43885291	44383936	498.645	8
	Gm04	44611649	45093386	481.737	2
	Gm04	45146452	45440686	294.234	4
	Gm04	45514250	45613405	99.155	2
	Gm04	45773963	45999196	225.233	2
	Gm04	46086046	46390533	304.487	5
	Gm04	46428018	46835852	407.834	7
	Gm04	46932652	47414790	482.138	6
	Gm04	47957714	47981836	24.122	2
	Gm04	48140577	48198636	58.059	2
	Gm04	48329448	48812166	482.718	7
	Gm04	48922546	48977363	54.817	2
	Gm05	649267	682648	33.381	2
	Gm05	765761	1236013	470.252	6
	Gm05	1294282	1547102	252.82	4
	Gm05	1705841	2032662	326.821	3
	Gm05	2967386	3131772	164.386	2
	Gm05	3284858	3569588	284.73	3
	Gm05	3905135	4079565	174.43	3
	Gm05	8492435	8525159	32.724	2
	Gm05	8597246	8695812	98.566	3
	Gm05	9012813	9097414	84.601	2
	Gm05	26685967	26728271	42.304	3
	Gm05	26773791	27226936	453.145	3
	Gm05	27342672	27460724	118.052	3
	Gm05	29461536	29489577	28.041	2
	Gm05	29970914	30172432	201.518	2
	Gm05	30702753	30976228	273.475	2
	Gm05	31274857	31399568	124.711	3
	Gm05	31454134	31553830	99.696	3
	Gm05	31605772	31662958	57.186	2
	Gm05	31767626	31827868	60.242	2
	Gm05	32327497	32361439	33.942	2
	Gm05	32565157	32654943	89.786	2
	Gm05	33050904	33176582	125.678	4
	Gm05	33472263	33618722	146.459	3
	Gm05	33651401	33929183	277.782	5
	Gm05	34081675	34294649	212.974	4
	Gm05	34570503	34692879	122.376	2
	Gm05	34801979	35103944	301.965	7
	Gm05	35326427	35450915	124.488	3
	Gm05	35724027	35992617	268.59	3
	Gm05	36393767	36769351	375.584	5
	Gm05	37043636	37115396	71.76	3
	Gm05	37260149	37650940	390.791	7
	Gm05	37990846	38098748	107.902	4
	Gm05	38636402	39083568	447.166	8
	Gm05	39341525	39643904	302.379	3
	Gm05	40147071	40528969	381.898	7
	Gm05	40791973	40942868	150.895	4
	Gm05	41066968	41344316	277.348	5
	Gm05	41481303	41866018	384.715	5
	Gm06	489058	657590	168.532	2
	Gm06	1101232	1216803	115.571	2
	Gm06	1328895	1514202	185.307	4
	Gm06	2325487	2481084	155.597	3
	Gm06	2596995	3077486	480.491	4
	Gm06	3143746	3608127	464.381	5
	Gm06	3880702	4124078	243.376	3
	Gm06	4422517	4644965	222.448	2
	Gm06	4820133	5135025	314.892	4
	Gm06	5829396	6141525	312.129	4
	Gm06	6488212	6838468	350.256	4
	Gm06	6914278	7072768	158.49	2
	Gm06	7918219	8015415	97.196	2
	Gm06	8079300	8483050	403.75	3
	Gm06	8979504	9263869	284.365	4
	Gm06	9668798	9952410	283.612	4
	Gm06	10124470	10464340	339.87	5
	Gm06	10693310	10993554	300.244	4
	Gm06	11098210	11479872	381.662	3
	Gm06	11659627	11948808	289.181	4
	Gm06	12252031	12544455	292.424	3
	Gm06	12963850	13401987	438.137	5
	Gm06	13528200	13811298	283.098	2
	Gm06	13881657	14058543	176.886	2
	Gm06	14138713	14359453	220.74	4
	Gm06	14452528	14511744	59.216	2
	Gm06	14682231	14859364	177.133	3
	Gm06	14924961	15032691	107.73	2
	Gm06	15115808	15242800	126.992	2
	Gm06	15376751	15453344	76.593	2
	Gm06	15571070	15793203	222.133	3
	Gm06	15847484	16207402	359.918	4
	Gm06	16853739	17188046	334.307	3
	Gm06	18033759	18447419	413.66	3
	Gm06	37732009	37823440	91.431	2
	Gm06	38232188	38703918	471.73	3
	Gm06	38999119	39421942	422.823	2
	Gm06	40671903	40878788	206.885	2
	Gm06	42515359	42883965	368.606	3
	Gm06	43235059	43688393	453.334	3
	Gm06	43980786	44474853	494.067	2
	Gm06	46271407	46564658	293.251	5
	Gm06	46790136	47238226	448.09	6
	Gm06	47338142	47550354	212.212	4
	Gm06	47631544	47764344	132.8	3
	Gm06	47987101	48261084	273.983	4
	Gm06	48699388	48785257	85.869	2
	Gm06	48829470	48988513	159.043	2
	Gm06	49343224	49570784	227.56	3
	Gm06	49643463	49722118	78.655	2
	Gm06	49792083	49915592	123.509	2
	Gm06	50038514	50261723	223.209	5
	Gm06	50453859	50494802	40.943	2
	Gm06	50593128	50641085	47.957	2
	Gm07	185603	527869	342.266	5
	Gm07	1119462	1246890	127.428	2
	Gm07	1382983	1630335	247.352	2
	Gm07	2267894	2512664	244.77	4
	Gm07	2580303	3042699	462.396	7
	Gm07	3143196	3318193	174.997	4
	Gm07	3953270	3990308	37.038	2
	Gm07	4837493	5014895	177.402	4
	Gm07	5097877	5490895	393.018	6
	Gm07	5636973	5863012	226.039	2
	Gm07	5944283	6069607	125.324	3
	Gm07	6521175	6555810	34.635	2
	Gm07	6604493	7096376	491.883	7
	Gm07	7284474	7505701	221.227	4
	Gm07	7579367	7666127	86.76	3
	Gm07	7732175	8166605	434.43	8
	Gm07	8327392	8488086	160.694	4
	Gm07	8535939	8748742	212.803	5
	Gm07	8887938	9305234	417.296	8
	Gm07	9402863	9535678	132.815	3
	Gm07	9628835	9684260	55.425	2
	Gm07	9774687	9863864	89.177	3
	Gm07	10009107	10236359	227.252	4
	Gm07	10806729	11218843	412.114	5
	Gm07	11517990	11956773	438.783	4
	Gm07	14090959	14552113	461.154	3
	Gm07	14862607	15085661	223.054	3
	Gm07	15590266	15663842	73.576	2
	Gm07	15717199	15800472	83.273	3
	Gm07	15870753	16020670	149.917	2
	Gm07	16031010	16155436	124.426	3
	Gm07	16393117	16438076	44.959	2
	Gm07	16532107	16979586	447.479	5
	Gm07	17362808	17615932	253.124	2
	Gm07	26960074	27445113	485.039	2
	Gm07	33333813	33718140	384.327	2
	Gm07	35142318	35194991	52.673	2
	Gm07	35547398	35619623	72.225	2
	Gm07	35809061	35992034	182.973	3
	Gm07	36285014	36357080	72.066	2
	Gm07	36551753	36998381	446.628	4
	Gm07	37096617	37543006	446.389	6
	Gm07	37813869	38146847	332.978	5
	Gm07	38182939	38334707	151.768	3
	Gm07	38429072	38631457	202.385	4
	Gm07	38811817	38861000	49.183	2
	Gm07	38991567	39225759	234.192	3
	Gm07	42851461	43067274	215.813	4
	Gm07	44451098	44621109	170.011	2
	Gm08	1504393	1817703	313.31	3
	Gm08	1882181	1970033	87.852	2
	Gm08	2288307	2467547	179.24	3
	Gm08	2837248	3285222	447.974	5
	Gm08	4266625	4667338	400.713	2
	Gm08	4873149	5278800	405.651	6
	Gm08	5701842	6188267	486.425	2
	Gm08	7512536	7876754	364.218	6
	Gm08	8268861	8305965	37.104	2
	Gm08	8695745	8803704	107.959	2
	Gm08	9339433	9789047	449.614	7
	Gm08	9885021	9970013	84.992	2
	Gm08	10418912	10570097	151.185	2
	Gm08	10621107	11073425	452.318	5
	Gm08	11257840	11501419	243.579	3
	Gm08	12189320	12392887	203.567	4
	Gm08	13348835	13459269	110.434	2
	Gm08	13782412	14233959	451.547	5
	Gm08	14353179	14833954	480.775	6
	Gm08	15131577	15538275	406.698	5
	Gm08	15829093	16256510	427.417	5
	Gm08	16516580	16964379	447.799	6
	Gm08	17019955	17484510	464.555	9
	Gm08	17529249	17718826	189.577	3
	Gm08	18379278	18748606	369.328	4
	Gm08	19117033	19525771	408.738	7
	Gm08	19635121	20123542	488.421	5
	Gm08	21170988	21443387	272.399	5
	Gm08	21933156	22123551	190.395	3
	Gm08	22502686	22702507	199.821	4
	Gm08	23245678	23639196	393.518	2
	Gm08	27721821	28027433	305.612	2
	Gm08	34085111	34506326	421.215	2
	Gm08	35102127	35467148	365.021	2
	Gm08	35664370	35856368	191.998	2
	Gm08	38044939	38534870	489.931	2
	Gm08	38670102	38965668	295.566	2
	Gm08	39378435	39543860	165.425	3
	Gm08	40173645	40303964	130.319	3
	Gm08	40345085	40670305	325.22	4
	Gm08	40735987	40882335	146.348	2
	Gm08	40953721	41427473	473.752	7
	Gm08	41504420	41844881	340.461	6
	Gm08	42210099	42541896	331.797	4
	Gm08	42593496	42793022	199.526	3
	Gm08	42859155	43071282	212.127	4
	Gm08	43306749	43432481	125.732	2
	Gm08	44368268	44632488	264.22	7
	Gm08	45060561	45541906	481.345	5
	Gm08	45590964	45893888	302.924	7
	Gm08	45981724	46188257	206.533	4
	Gm08	46804090	46881874	77.784	2
	Gm09	104404	342047	237.643	2
	Gm09	611923	720803	108.88	2
	Gm09	998472	1111460	112.988	2
	Gm09	1251128	1723633	472.505	6
	Gm09	1791363	1888876	97.513	2
	Gm09	2327785	2784336	456.551	5
	Gm09	2926870	3174245	247.375	4
	Gm09	3230237	3708901	478.664	5
	Gm09	3807440	3934271	126.831	2
	Gm09	4152772	4354636	201.864	3
	Gm09	5016500	5122231	105.731	3
	Gm09	5514307	5799228	284.921	2
	Gm09	5979646	6030925	51.279	2
	Gm09	6197309	6511884	314.575	4
	Gm09	6664095	6729236	65.141	3
	Gm09	11854826	12240541	385.715	3
	Gm09	17858067	18223900	365.833	2
	Gm09	18598782	18799217	200.435	3
	Gm09	29782119	30089678	307.559	2
	Gm09	32987730	33313292	325.562	2
	Gm09	33624152	33894091	269.939	2
	Gm09	35962679	36346737	384.058	3
	Gm09	36486860	36946741	459.881	3
	Gm09	38013391	38454149	440.758	2
	Gm09	38676111	39067581	391.47	6
	Gm09	39225332	39693036	467.704	7
	Gm09	39780964	40113368	332.404	4
	Gm09	40326613	40638454	311.841	3
	Gm09	40706793	40822345	115.552	2
	Gm09	41103872	41389071	285.199	3
	Gm09	42181997	42241644	59.647	2
	Gm09	42526589	42679986	153.397	3
	Gm09	43508261	43820536	312.275	5
	Gm09	43874852	44266451	391.599	5
	Gm09	44398393	44855340	456.947	4
	Gm09	44963125	45101803	138.678	2
	Gm09	45482083	45961226	479.143	8
	Gm09	46243163	46570461	327.298	4
	Gm10	121493	227864	106.371	3
	Gm10	711291	1051336	340.045	5
	Gm10	1232205	1475647	243.442	4
	Gm10	1586434	1623075	36.641	2
	Gm10	2240113	2714130	474.017	4
	Gm10	3022221	3276787	254.566	4
	Gm10	3338315	3375821	37.506	2
	Gm10	3962673	4360182	397.509	6
	Gm10	4628151	4722679	94.528	3
	Gm10	4814162	4972351	158.189	3
	Gm10	5026251	5206933	180.682	2
	Gm10	5295541	5404728	109.187	2
	Gm10	5556984	5922076	365.092	2
	Gm10	6196864	6663940	467.076	6
	Gm10	9207487	9522845	315.358	2
	Gm10	9575150	10015896	440.746	2
	Gm10	12080275	12500364	420.089	2
	Gm10	13185363	13684185	498.822	2
	Gm10	23868600	23967467	98.867	2
	Gm10	26188429	26598887	410.458	2
	Gm10	36276152	36761186	485.034	7
	Gm10	36975604	37066910	91.306	3
	Gm10	38025918	38105991	80.073	2
	Gm10	38489306	38535822	46.516	2
	Gm10	38661148	39086213	425.065	5
	Gm10	39350141	39827303	477.162	4
	Gm10	39937578	40022334	84.756	2
	Gm10	40077126	40258740	181.614	2
	Gm10	40588398	40692799	104.401	3
	Gm10	40784262	41103076	318.814	2
	Gm10	41374120	41610215	236.095	4
	Gm10	41958155	42296579	338.424	2
	Gm10	42920895	43107961	187.066	3
	Gm10	43178809	43612052	433.243	2
	Gm10	43662144	43840376	178.232	2
	Gm10	43894668	44274964	380.296	6
	Gm10	44445941	44574663	128.722	4
	Gm10	44744804	44972284	227.48	2
	Gm10	45051560	45245539	193.979	3
	Gm10	45332216	45670539	338.323	3
	Gm10	45863169	46351117	487.948	7
	Gm10	46401717	46688003	286.286	3
	Gm10	47377738	47834616	456.878	6
	Gm10	49967536	50395207	427.671	5
	Gm11	423298	614313	191.015	3
	Gm11	1055471	1093109	37.638	2
	Gm11	1267809	1339540	71.731	2
	Gm11	1395042	1620921	225.879	4
	Gm11	1711864	1874390	162.526	4
	Gm11	2092125	2167393	75.268	2
	Gm11	2625440	2777893	152.453	2
	Gm11	3432665	3856937	424.272	4
	Gm11	3950213	4094763	144.55	2
	Gm11	4135246	4345198	209.952	4
	Gm11	4453218	4796577	343.359	5
	Gm11	4866335	4961902	95.567	2
	Gm11	5065170	5238788	173.618	2
	Gm11	5293932	5791137	497.205	4
	Gm11	5875855	5983320	107.465	3
	Gm11	6232705	6383207	150.502	3
	Gm11	6619367	6906614	287.247	5
	Gm11	7358578	7395703	37.125	2
	Gm11	7596095	8095797	499.702	7
	Gm11	8185486	8237055	51.569	2
	Gm11	8363320	8766576	403.256	4
	Gm11	8942593	9038408	95.815	2
	Gm11	10360391	10509014	148.623	3
	Gm11	10721006	10999596	278.59	4
	Gm11	11572077	11932224	360.147	3
	Gm11	14084162	14571958	487.796	3
	Gm11	14663140	14896456	233.316	3
	Gm11	15558504	15924043	365.539	4
	Gm11	16109471	16404733	295.262	4
	Gm11	17116826	17144707	27.881	2
	Gm11	17537324	17988599	451.275	4
	Gm11	29678792	30114058	435.266	2
	Gm11	30227104	30588492	361.388	2
	Gm11	32839864	32910236	70.372	2
	Gm11	33303552	33555216	251.664	3
	Gm11	36404950	36778892	373.942	5
	Gm11	36931482	37106045	174.563	4
	Gm11	37237023	37291736	54.713	2
	Gm11	37808033	38183607	375.574	5
	Gm11	38261784	38299330	37.546	2
	Gm11	38424068	38648336	224.268	3
	Gm11	38892011	39108822	216.811	3
	Gm12	82828	553862	471.034	6
	Gm12	632910	1064727	431.817	6
	Gm12	1070930	1460019	389.089	6
	Gm12	1531850	1632399	100.549	2
	Gm12	1761905	2184391	422.486	5
	Gm12	2331255	2681036	349.781	3
	Gm12	2847459	3296301	448.842	5
	Gm12	3309895	3416958	107.063	2
	Gm12	3459699	3663850	204.151	5
	Gm12	3843573	4268262	424.689	4
	Gm12	4363882	4592200	228.318	2
	Gm12	5610878	6023395	412.517	4
	Gm12	6195964	6420304	224.34	5
	Gm12	6846625	6892713	46.088	2
	Gm12	6932978	7316668	383.69	4
	Gm12	7584843	8075838	490.995	4
	Gm12	8435100	8469462	34.362	2
	Gm12	8844839	9193994	349.155	6
	Gm12	9770096	9871018	100.922	3
	Gm12	13017486	13354287	336.801	2
	Gm12	14231203	14694597	463.394	5
	Gm12	15451614	15877490	425.876	4
	Gm12	16787022	17013260	226.238	2
	Gm12	24271835	24320821	48.986	2
	Gm12	32537979	32771353	233.374	4
	Gm12	33258930	33680937	422.007	2
	Gm12	33892140	34102452	210.312	2
	Gm12	34217043	34380492	163.449	2
	Gm12	34776200	35192993	416.793	3
	Gm12	35586020	36002148	416.128	4
	Gm12	36496913	36700187	203.274	3
	Gm12	36960931	37136269	175.338	4
	Gm12	37315664	37803362	487.698	5
	Gm12	37971963	38338813	366.85	5
	Gm12	38706055	38995703	289.648	2
	Gm12	39156556	39606543	449.987	5
	Gm13	50706	297095	246.389	5
	Gm13	344320	790808	446.488	4
	Gm13	850370	898111	47.741	2
	Gm13	1435626	1624949	189.323	3
	Gm13	2558742	2993802	435.06	4
	Gm13	3316463	3719806	403.343	3
	Gm13	3822639	4319851	497.212	4
	Gm13	4739271	4817327	78.056	2
	Gm13	5075945	5211326	135.381	2
	Gm13	5259517	5480962	221.445	3
	Gm13	5872811	6072061	199.25	2
	Gm13	6151892	6342969	191.077	3
	Gm13	6509852	6811934	302.082	5
	Gm13	7102873	7285098	182.225	2
	Gm13	7532164	7810247	278.083	4
	Gm13	7935638	8106523	170.885	2
	Gm13	8168052	8587714	419.662	5
	Gm13	9993080	10330320	337.24	2
	Gm13	12045535	12158356	112.821	2
	Gm13	13159950	13613605	453.655	2
	Gm13	13756682	13892231	135.549	2
	Gm13	16365275	16721293	356.018	2
	Gm13	17191857	17652991	461.134	2
	Gm13	18597519	19040172	442.653	2
	Gm13	21773778	22047323	273.545	2
	Gm13	23131251	23509779	378.528	4
	Gm13	25174854	25271849	96.995	2
	Gm13	25707705	26096564	388.859	5
	Gm13	26291720	26573887	282.167	4
	Gm13	26684102	26749514	65.412	2
	Gm13	27132590	27418207	285.617	6
	Gm13	27846120	27935177	89.057	2
	Gm13	28141969	28206014	64.045	2
	Gm13	28252435	28323043	70.608	2
	Gm13	28437643	28868130	430.487	4
	Gm13	28918187	28957669	39.482	2
	Gm13	29375136	29524129	148.993	4
	Gm13	29565413	29808335	242.922	4
	Gm13	29941083	30078140	137.057	2
	Gm13	30268845	30479725	210.88	4
	Gm13	30744043	30942034	197.991	4
	Gm13	31013252	31135256	122.004	3
	Gm13	31262161	31424193	162.032	2
	Gm13	31491632	31766939	275.307	4
	Gm13	31934756	32210915	276.159	4
	Gm13	32254260	32435575	181.315	3
	Gm13	32795953	32875289	79.336	2
	Gm13	33004100	33306556	302.456	6
	Gm13	33597361	33821100	223.739	4
	Gm13	34465720	34602307	136.587	2
	Gm13	34645498	34946643	301.145	4
	Gm13	35032818	35171829	139.011	2
	Gm13	35823484	35909612	86.128	3
	Gm13	36031702	36073020	41.318	2
	Gm13	36224364	36261107	36.743	2
	Gm13	36316916	36551803	234.887	4
	Gm13	36716562	37204738	488.176	4
	Gm13	38032737	38442998	410.261	4
	Gm13	38492652	38840706	348.054	4
	Gm13	39054715	39065528	10.813	2
	Gm13	39307253	39567369	260.116	3
	Gm13	40434294	40665132	230.838	4
	Gm13	40715679	41210917	495.238	5
	Gm13	41424200	41818065	393.865	3
	Gm13	42027425	42452681	425.256	6
	Gm14	86112	387906	301.794	3
	Gm14	587754	766413	178.659	2
	Gm14	837938	1167509	329.571	3
	Gm14	1253814	1613564	359.75	6
	Gm14	1657815	1723025	65.21	2
	Gm14	2131407	2266236	134.829	3
	Gm14	2311158	2480875	169.717	3
	Gm14	2597934	2650425	52.491	2
	Gm14	2762103	2854797	92.694	2
	Gm14	3042771	3092838	50.067	2
	Gm14	3328915	3346328	17.413	2
	Gm14	3648283	3779194	130.911	3
	Gm14	3932543	4184275	251.732	4
	Gm14	4571618	4811528	239.91	4
	Gm14	4889916	4956317	66.401	2
	Gm14	5861292	5908034	46.742	2
	Gm14	6203160	6514301	311.141	3
	Gm14	6554406	6912739	358.333	5
	Gm14	7151265	7195140	43.875	2
	Gm14	7690766	7733148	42.382	2
	Gm14	8027761	8527621	499.86	6
	Gm14	8918021	9258533	340.512	3
	Gm14	9307586	9803364	495.778	5
	Gm14	9907255	10197799	290.544	3
	Gm14	10360733	10704639	343.906	5
	Gm14	12224854	12712102	487.248	2
	Gm14	13119138	13614066	494.928	5
	Gm14	18515404	18927676	412.272	2
	Gm14	19030405	19164288	133.883	3
	Gm14	27937142	28361034	423.892	3
	Gm14	31348204	31829614	481.41	2
	Gm14	32629667	32943443	313.776	2
	Gm14	33918871	34265654	346.783	2
	Gm14	37234273	37444310	210.037	2
	Gm14	40852336	41187024	334.688	3
	Gm14	42703536	43053930	350.394	3
	Gm14	43270248	43417417	147.169	3
	Gm14	43744309	44193109	448.8	3
	Gm14	44393026	44854103	461.077	4
	Gm14	45186718	45457682	270.964	3
	Gm14	46557629	46898740	341.111	4
	Gm14	47081002	47354923	273.921	2
	Gm14	47418167	47475993	57.826	2
	Gm14	47565830	47643269	77.439	3
	Gm14	47895113	48026115	131.002	3
	Gm14	48425707	48535790	110.083	3
	Gm14	48836596	49107190	270.594	2
	Gm14	49199294	49503348	304.054	3
	Gm15	630331	741627	111.296	2
	Gm15	756303	1007132	250.829	4
	Gm15	1842053	2198097	356.044	6
	Gm15	2781077	3160423	379.346	3
	Gm15	3281983	3334810	52.827	2
	Gm15	4114622	4315169	200.547	3
	Gm15	4406751	4522374	115.623	3
	Gm15	4911708	5312718	401.01	4
	Gm15	5522858	5638918	116.06	2
	Gm15	5897409	6047557	150.148	3
	Gm15	6272006	6674572	402.566	3
	Gm15	6772445	6823009	50.564	2
	Gm15	7023081	7080649	57.568	2
	Gm15	7637174	7829610	192.436	2
	Gm15	8134735	8579398	444.663	6
	Gm15	8697425	8715603	18.178	2
	Gm15	9058303	9520804	462.501	4
	Gm15	9594410	9733870	139.46	2
	Gm15	9829561	10059948	230.387	4
	Gm15	10129096	10580977	451.881	5
	Gm15	10874410	11317994	443.584	6
	Gm15	11421179	11620426	199.247	4
	Gm15	11712082	11855585	143.503	2
	Gm15	12414192	12475289	61.097	2
	Gm15	12531884	12611331	79.447	2
	Gm15	13014539	13180039	165.5	3
	Gm15	13257987	13427310	169.323	2
	Gm15	13801080	14243520	442.44	6
	Gm15	14329774	14780339	450.565	7
	Gm15	14850682	15220762	370.08	5
	Gm15	15511644	15952535	440.891	5
	Gm15	28616409	28916718	300.309	2
	Gm15	29706012	29956672	250.66	2
	Gm15	32298822	32461857	163.035	2
	Gm15	33001719	33030559	28.84	2
	Gm15	35867161	36306421	439.26	2
	Gm15	39331659	39590380	258.721	2
	Gm15	39888568	40040705	152.137	2
	Gm15	40461287	40878937	417.65	2
	Gm15	43797502	44059851	262.349	2
	Gm15	46698746	46785794	87.048	2
	Gm15	47255820	47421641	165.821	2
	Gm15	47679988	48117938	437.95	5
	Gm15	48259512	48604174	344.662	3
	Gm15	48653554	48727813	74.259	2
	Gm15	48802538	49226394	423.856	5
	Gm15	49318218	49543373	225.155	4
	Gm15	49560894	49890175	329.281	3
	Gm15	50128503	50626980	498.477	4
	Gm16	35846	298188	262.342	4
	Gm16	761034	1101441	340.407	3
	Gm16	1332815	1566778	233.963	4
	Gm16	1708510	1936692	228.182	2
	Gm16	2405914	2513346	107.432	2
	Gm16	2619084	3036177	417.093	6
	Gm16	3099668	3246299	146.631	2
	Gm16	3598173	3775913	177.74	2
	Gm16	3917294	3962328	45.034	2
	Gm16	4285389	4399162	113.773	3
	Gm16	4908430	5025452	117.022	3
	Gm16	5340777	5429551	88.774	2
	Gm16	5477316	5614337	137.021	3
	Gm16	5656680	5928303	271.623	3
	Gm16	6179363	6423098	243.735	2
	Gm16	6702694	7070805	368.111	5
	Gm16	7237873	7636967	399.094	6
	Gm16	8354720	8540188	185.468	3
	Gm16	23995972	24389823	393.851	3
	Gm16	24612301	24793404	181.103	2
	Gm16	25127133	25378270	251.137	2
	Gm16	27750410	28232079	481.669	3
	Gm16	28407237	28443553	36.316	2
	Gm16	28613278	28961127	347.849	7
	Gm16	29181015	29261393	80.378	2
	Gm16	29930067	30151465	221.398	5
	Gm16	30456714	30766209	309.495	4
	Gm16	30991544	31332752	341.208	5
	Gm16	31454423	31710278	255.855	4
	Gm16	31787658	31837545	49.887	2
	Gm16	32017661	32200441	182.78	4
	Gm16	32340079	32484340	144.261	2
	Gm16	32534697	32665742	131.045	2
	Gm16	33210540	33608003	397.463	4
	Gm16	33798911	33875871	76.96	2
	Gm16	35700223	35933600	233.377	4
	Gm16	36013043	36132536	119.493	2
	Gm16	36218124	36413821	195.697	4
	Gm16	36520601	36622229	101.628	3
	Gm16	36732450	36983033	250.583	4
	Gm16	37026443	37078478	52.035	2
	Gm16	37161151	37209075	47.924	2
	Gm17	270328	714916	444.588	6
	Gm17	2161335	2637958	476.623	6
	Gm17	3126540	3500196	373.656	6
	Gm17	3627810	3709542	81.732	2
	Gm17	4312738	4432877	120.139	3
	Gm17	4789679	5042611	252.932	3
	Gm17	5887651	6153400	265.749	3
	Gm17	8194356	8563621	369.265	5
	Gm17	8595668	8956091	360.423	6
	Gm17	9065734	9278867	213.133	4
	Gm17	9590152	9684872	94.72	3
	Gm17	11915787	12062312	146.525	2
	Gm17	12210561	12684761	474.2	3
	Gm17	12765768	13253012	487.244	4
	Gm17	13349399	13487812	138.413	2
	Gm17	13660920	14127379	466.459	3
	Gm17	15493313	15872822	379.509	2
	Gm17	17726952	17971540	244.588	2
	Gm17	31111789	31276262	164.473	2
	Gm17	31544109	32038975	494.866	2
	Gm17	32367167	32625352	258.185	2
	Gm17	35260239	35679376	419.137	2
	Gm17	36269982	36702131	432.149	9
	Gm17	36782012	37204244	422.232	3
	Gm17	37335550	37391436	55.886	2
	Gm17	37769727	37843080	73.353	2
	Gm17	37989202	38051554	62.352	2
	Gm17	38170820	38540012	369.192	6
	Gm17	38663168	38840463	177.295	3
	Gm17	39388462	39584371	195.909	4
	Gm17	39702186	39891056	188.87	2
	Gm17	40335241	40827927	492.686	2
	Gm17	40876856	41011181	134.325	2
	Gm17	41132916	41481512	348.596	3
	Gm17	41674343	41866889	192.546	2
	Gm18	54979	200292	145.313	3
	Gm18	298221	347275	49.054	2
	Gm18	580733	930251	349.518	4
	Gm18	963047	1158628	195.581	5
	Gm18	1427298	1562162	134.864	2
	Gm18	1620585	1788740	168.155	3
	Gm18	1848675	2007638	158.963	3
	Gm18	2103682	2228646	124.964	3
	Gm18	2284997	2624621	339.624	5
	Gm18	2788360	2833147	44.787	2
	Gm18	2919236	2991817	72.581	2
	Gm18	3169557	3219211	49.654	2
	Gm18	3566129	3954704	388.575	6
	Gm18	4754894	4921501	166.607	4
	Gm18	4979434	5133882	154.448	2
	Gm18	5961229	6032670	71.441	2
	Gm18	6584445	6764775	180.33	4
	Gm18	6840290	7149340	309.05	3
	Gm18	7233159	7348168	115.009	3
	Gm18	7515726	7895324	379.598	6
	Gm18	8777288	8851746	74.458	2
	Gm18	9033598	9382031	348.433	4
	Gm18	9678773	10114401	435.628	5
	Gm18	10445035	10830653	385.618	3
	Gm18	11614607	12025451	410.844	6
	Gm18	12406839	12545953	139.114	3
	Gm18	12805012	13242941	437.929	5
	Gm18	14951019	15324039	373.02	2
	Gm18	15669089	16141327	472.238	2
	Gm18	16378492	16728761	350.269	3
	Gm18	18199183	18565643	366.46	3
	Gm18	18576322	18650956	74.634	2
	Gm18	19349342	19666596	317.254	2
	Gm18	20016356	20208232	191.876	2
	Gm18	20552071	21042079	490.008	4
	Gm18	21677373	22152820	475.447	3
	Gm18	24826260	25169738	343.478	2
	Gm18	31838260	32169391	331.131	2
	Gm18	34158032	34401760	243.728	2
	Gm18	36637036	36929655	292.619	2
	Gm18	37934784	38257741	322.957	2
	Gm18	39612141	39865192	253.051	2
	Gm18	46081850	46416185	334.335	3
	Gm18	47380987	47878067	497.08	5
	Gm18	47946184	48100117	153.933	3
	Gm18	48485986	48849749	363.763	4
	Gm18	49148526	49375674	227.148	3
	Gm18	51867289	52315759	448.47	2
	Gm18	52459634	52908174	448.54	4
	Gm18	52978104	53098348	120.244	3
	Gm18	53457728	53574057	116.329	2
	Gm18	53627468	53762458	134.99	2
	Gm18	53856096	54076266	220.17	2
	Gm18	54546234	54778060	231.826	3
	Gm18	54874544	55005206	130.662	4
	Gm18	55167509	55286927	119.418	2
	Gm18	56097147	56400352	303.205	3
	Gm18	56486524	56910277	423.753	6
	Gm18	57037107	57126096	88.989	2
	Gm18	57227205	57346419	119.214	2
	Gm18	57517100	57699960	182.86	3
	Gm18	57772016	58010203	238.187	3
	Gm18	58287938	58333122	45.184	2
	Gm18	58521532	58663461	141.929	3
	Gm18	58806948	59009549	202.601	3
	Gm18	59083419	59265445	182.026	3
	Gm18	59331419	59600111	268.692	2
	Gm18	60278667	60362448	83.781	2
	Gm18	60741380	60868392	127.012	2
	Gm18	60938849	61113746	174.897	3
	Gm18	61175038	61450878	275.84	4
	Gm18	61528293	61668426	140.133	3
	Gm18	61723602	61918670	195.068	2
	Gm18	61970234	62190919	220.685	4
	Gm19	50256	264003	213.747	3
	Gm19	427448	549103	121.655	2
	Gm19	823640	885858	62.218	2
	Gm19	1051648	1542717	491.069	8
	Gm19	1811142	1954907	143.765	2
	Gm19	1974292	2372133	397.841	4
	Gm19	2908143	3162877	254.734	3
	Gm19	3343257	3737224	393.967	3
	Gm19	4157679	4277068	119.389	2
	Gm19	7350768	7386845	36.077	2
	Gm19	8154523	8463500	308.977	3
	Gm19	8622769	8799077	176.308	4
	Gm19	8890466	8988500	98.034	2
	Gm19	10079530	10497079	417.549	3
	Gm19	11984846	12437993	453.147	2
	Gm19	12665984	12915522	249.538	2
	Gm19	22847816	23297209	449.393	2
	Gm19	25524688	25626460	101.772	2
	Gm19	27283886	27504596	220.71	2
	Gm19	32194361	32318695	124.334	2
	Gm19	34156474	34472334	315.86	5
	Gm19	34600226	35007908	407.682	6
	Gm19	35240406	35555581	315.175	6
	Gm19	35744912	35776664	31.752	2
	Gm19	35979179	36191998	212.819	2
	Gm19	36276581	36313784	37.203	2
	Gm19	36505181	36691284	186.103	4
	Gm19	37591447	37932358	340.911	5
	Gm19	38121212	38239219	118.007	3
	Gm19	38512160	38814028	301.868	2
	Gm19	38917571	39151328	233.757	3
	Gm19	39261055	39298979	37.924	2
	Gm19	39380280	39433067	52.787	3
	Gm19	39686084	40143590	457.506	4
	Gm19	40219547	40350365	130.818	4
	Gm19	41192542	41516358	323.816	5
	Gm19	42089062	42195616	106.554	3
	Gm19	42812863	43117852	304.989	2
	Gm19	43356748	43678560	321.812	4
	Gm19	43874271	44277545	403.274	2
	Gm19	44311841	44462578	150.737	3
	Gm19	44761515	45255796	494.281	6
	Gm19	45361938	45525374	163.436	3
	Gm19	46210953	46279899	68.946	2
	Gm19	46516194	46647127	130.933	3
	Gm19	47089771	47211510	121.739	2
	Gm19	49261156	49462084	200.928	4
	Gm19	49497775	49629185	131.41	2
	Gm19	49786000	50107667	321.667	2
	Gm19	50184509	50486916	302.407	4
	Gm20	51113	342779	291.666	5
	Gm20	376751	621723	244.972	2
	Gm20	695013	827937	132.924	3
	Gm20	880979	932104	51.125	2
	Gm20	1306005	1379470	73.465	3
	Gm20	1456885	1943918	487.033	6
	Gm20	2372509	2804571	432.062	4
	Gm20	3020597	3078662	58.065	2
	Gm20	7927513	8185857	258.344	2
	Gm20	23477210	23536158	58.948	2
	Gm20	26500747	26785339	284.592	2
	Gm20	32550693	32603292	52.599	2
	Gm20	33049242	33275560	226.318	4
	Gm20	33405047	33482879	77.832	2
	Gm20	33676755	33842096	165.341	4
	Gm20	34057184	34240236	183.052	3
	Gm20	34881595	34942502	60.907	2
	Gm20	35181513	35378782	197.269	4
	Gm20	35523599	35761130	237.531	4
	Gm20	36095037	36153048	58.011	2
	Gm20	36478507	36651429	172.922	3
	Gm20	36710448	36934546	224.098	3
	Gm20	37211061	37410040	198.979	2
	Gm20	37857633	38195568	337.935	5
	Gm20	38306103	38616560	310.457	4
	Gm20	40618399	40679826	61.427	2
	Gm20	40765691	41180602	414.911	4
	Gm20	41449898	41561802	111.904	2
	Gm20	41722165	41919369	197.204	3
	Gm20	42988581	43485102	496.521	5
	Gm20	43810783	44260228	449.445	4
	Gm20	44329030	44728794	399.764	6
	Gm20	44828590	45116741	288.151	4
	Gm20	45327121	45724030	396.909	6
	Gm20	45896946	46008718	111.772	3
	Gm20	46056821	46235513	178.692	4
	Gm20	46314790	46574547	259.757	4
